# Supplementary material
Source: PubMed Central journal article supplement (PMC8447550)

Supplementary Material for

# Aggregation versus inclusion complexes to solubilize drugs with Cyclodextrins. A case study using sulphobutylether- $\beta$ -cyclodextrins and remdesivir

Ángel Piñeiro<sup>1</sup>, James Pipkin<sup>2</sup>, Vince Antle<sup>2</sup>, Rebeca Garcia-Fandino<sup>3\*</sup>

<sup>1</sup>Departamento de Física de Aplicada, Facultade de Física, Universidade de Santiago de Compostela, E-15782 Santiago de Compostela, Spain

<sup>2</sup>Ligand Pharmaceuticals Incorporated, 3911 Sorrento Valley Boulevard, San Diego, California U.S.A.

<sup>3</sup>Departamento de Química Orgánica, Center for Research in Biological Chemistry and Molecular Materials, Universidade de Santiago de Compostela, Campus Vida s/n, E-15782 Santiago de Compostela, Spain

\*[rebeca.garcia.fandino@usc.es](mailto:rebeca.garcia.fandino@usc.es)



**Table S1.-** Average number of clusters for all the molecules, for the CD molecules and for the Remdesivir molecules, determined through the last 100 ns of all the trajectories, together with the corresponding standard deviation values.

| CD ID | #REMD | All        |           | CDs        |           | REMD      |           |
|-------|-------|------------|-----------|------------|-----------|-----------|-----------|
|       |       | Neutral    | Charged   | Neutral    | Charged   | Neutral   | Charged   |
| 5SBE  | 1     | 10.2±1.4   | 10.2±1.0  | 10.2±1.4   | 10.2±1.06 | 1.0±0.0   | 1.0±0.0   |
|       | 2     | 10.8±1.5   | 8.01±0.90 | 10.9±1.4   | 8.06±0.91 | 2.0±0.0   | 2.0±0.0   |
|       | 4     | 8.07±0.84  | 9.5±1.0   | 8.27±0.94  | 10.1±1.2  | 2.85±0.38 | 2.81±0.39 |
|       | 8     | 7.9±1.3    | 5.4±1.0   | 8.5±1.4    | 5.6±1.1   | 4.1±0.3   | 5.72±0.58 |
| 6SBE  | 1     | 10.11±0.86 | 9.5±1.1   | 10.11±0.87 | 9.5±1.1   | 1.0±0.0   | 1.0±0.0   |
|       | 2     | 11.6±1.4   | 8.9±1.1   | 11.7±1.4   | 8.9±1.1   | 2.0±0.0   | 1.0±0.0   |
|       | 4     | 8.4±1.3    | 6.26±0.86 | 8.8±1.3    | 6.4±0.89  | 2.00±0.05 | 4.0±0.0   |
|       | 8     | 10.4±1.1   | 7.57±0.92 | 10.8±1.2   | 7.9±1.2   | 2.01±0.09 | 5.02±0.14 |
| 7SBE  | 1     | 10.95±0.90 | 11.9±1.3  | 11.13±0.90 | 12.0±1.3  | 1.0±0.0   | 1.0±0.0   |
|       | 2     | 10.05±0.73 | 9.86±0.68 | 10.97±0.76 | 9.90±0.72 | 1.0±0.0   | 2.0±0.0   |
|       | 4     | 9.9±1.6    | 8.8±1.3   | 10.0±1.6   | 9.4±1.2   | 3.0±0.0   | 3.00±0.03 |
|       | 8     | 9.98±0.84  | 8.32±0.57 | 10.75±0.89 | 8.52±0.72 | 3.54±0.50 | 4.99±0.12 |

**Table S2.-** Average number of H-bonds between CDs, between CDs and remdesivir, between CD and water and between remdesivir and water, determined through the last 100 ns of all the trajectories, together with the corresponding standard deviation values. The first and third double columns are normalized by CD molecule while the second and last double columns are normalized by drug molecule.

| CD ID | #REMD | CD-CD     |           | CD-REMD   |           | CD-Water |          | REMD-Water |           |
|-------|-------|-----------|-----------|-----------|-----------|----------|----------|------------|-----------|
|       |       | Neutral   | Charged   | Neutral   | Charged   | Neutral  | Charged  | Neutral    | Charged   |
| 5SBE  | 1     | 3.88±0.45 | 4.01±0.35 | 2.68±0.98 | 5.4±1.1   | 61.6±1.2 | 60.8±1.1 | 3.0±1.3    | 3.0±1.4   |
|       | 2     | 3.80±0.37 | 4.32±0.38 | 1.88±0.76 | 4.42±0.91 | 61.6±1.1 | 59.9±1.1 | 3.5±1.1    | 5.1±1.0   |
|       | 4     | 4.37±0.37 | 3.72±0.36 | 2.37±0.54 | 4.30±0.67 | 59.7±1.1 | 60.4±1.1 | 3.11±0.71  | 2.71±0.59 |
|       | 8     | 3.98±0.36 | 4.52±0.33 | 2.25±0.35 | 4.49±0.43 | 59.6±1.1 | 55.9±1.0 | 3.12±0.48  | 2.76±0.49 |
| 6SBE  | 1     | 3.95±0.37 | 3.87±0.33 | 1.7±1.1   | 4.2±1.3   | 67.1±1.1 | 66.9±1.1 | 3.5±1.8    | 5.5±1.6   |
|       | 2     | 3.35±0.39 | 3.88±0.37 | 2.37±0.64 | 4.31±0.76 | 68.1±1.2 | 66.6±1.2 | 3.4±1.0    | 2.56±0.81 |
|       | 4     | 3.90±0.36 | 4.32±0.36 | 1.64±0.45 | 4.57±0.56 | 66.5±1.1 | 64.2±1.1 | 3.31±0.65  | 2.77±0.65 |
|       | 8     | 3.17±0.33 | 3.71±0.33 | 1.89±0.39 | 3.93±0.39 | 67.5±1.1 | 64.1±1.0 | 2.61±0.42  | 3.76±0.47 |
| 7SBE  | 1     | 3.38±0.34 | 3.36±0.51 | 2.18±0.87 | 4.3±1.2   | 73.9±1.1 | 74.0±1.5 | 3.3±1.5    | 2.4±1.3   |
|       | 2     | 4.06±0.38 | 4.04±0.39 | 2.33±0.56 | 4.79±0.89 | 72.2±1.2 | 71.4±1.3 | 2.34±0.90  | 2.56±0.86 |
|       | 4     | 3.68±0.37 | 3.82±0.31 | 2.05±0.45 | 3.23±0.56 | 72.6±1.2 | 71.2±1.1 | 2.68±0.63  | 3.91±0.95 |
|       | 8     | 3.41±0.32 | 3.62±0.32 | 1.83±0.32 | 4.10±0.41 | 72.3±1.1 | 69.6±1.1 | 2.98±0.46  | 2.78±0.47 |

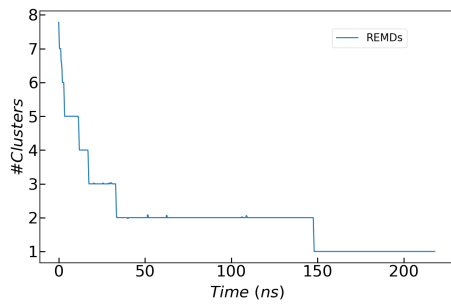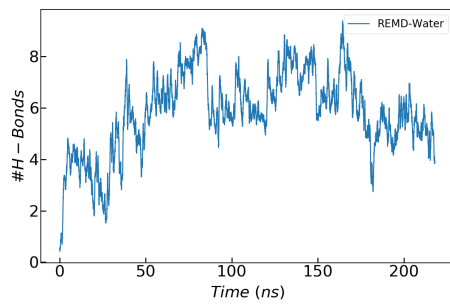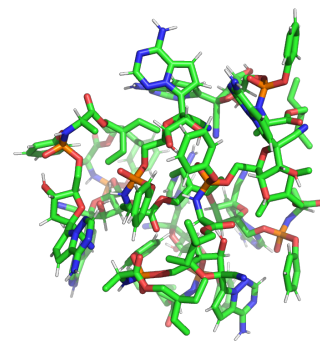

8 x Neutral Remdesivir

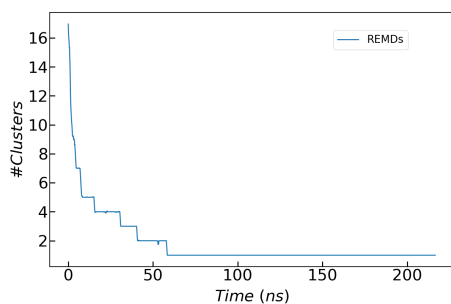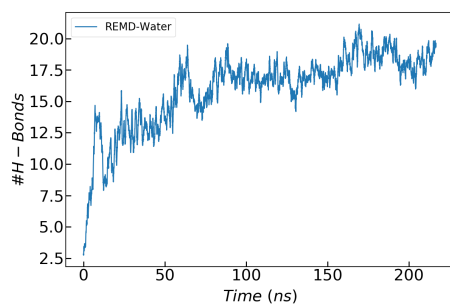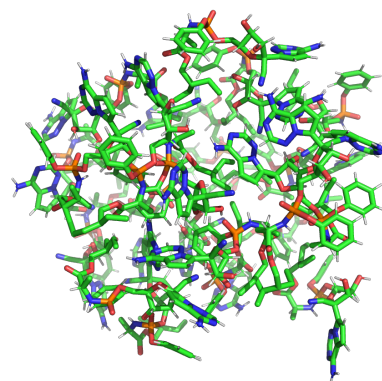

20 x Neutral Remdesivir

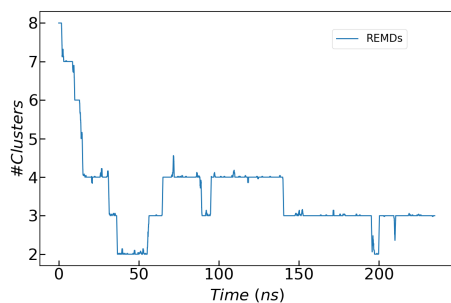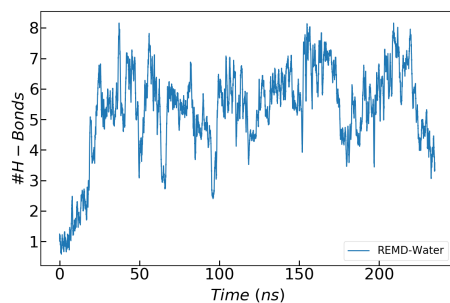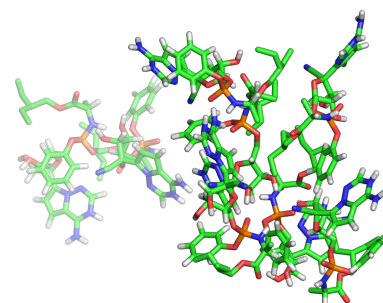

8 x Protonated Remdesivir

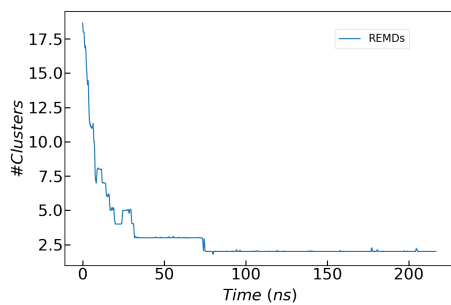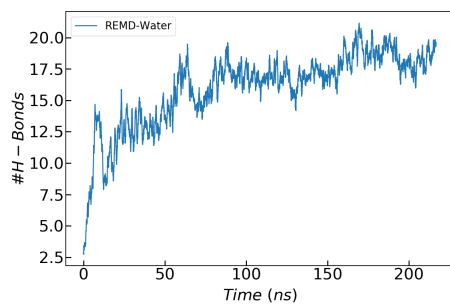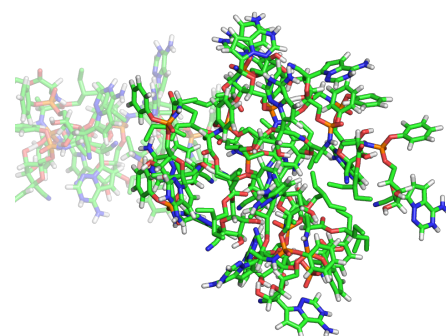

20 x Protonated Remdesivir

## 2 x 7SBE + 1 x Neutral Remdesivir

Distance between cyclodextrins and remdesivir molecules as a function of time:

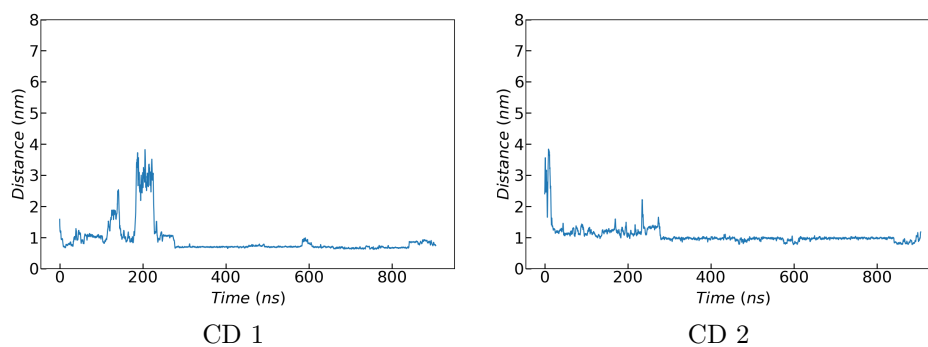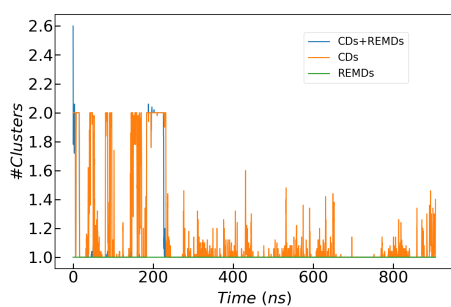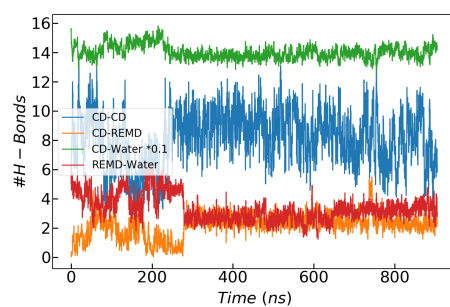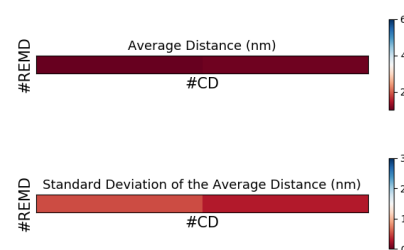

Snapshots taken from the last conformation:

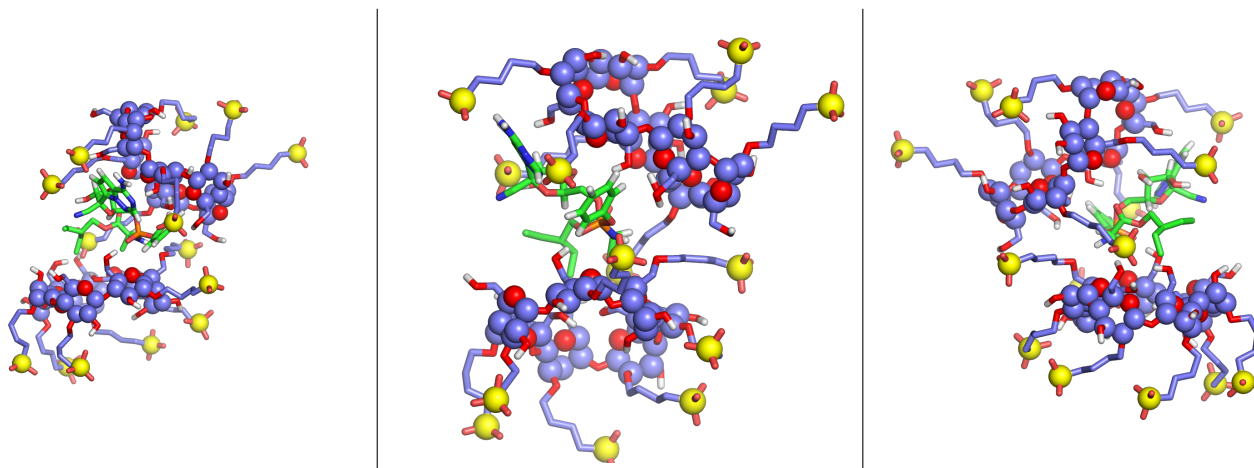

## 2 x 7SBE + 1 x Neutral Remdesivir

Distance between cyclodextrins and remdesivir molecules as a function of time:

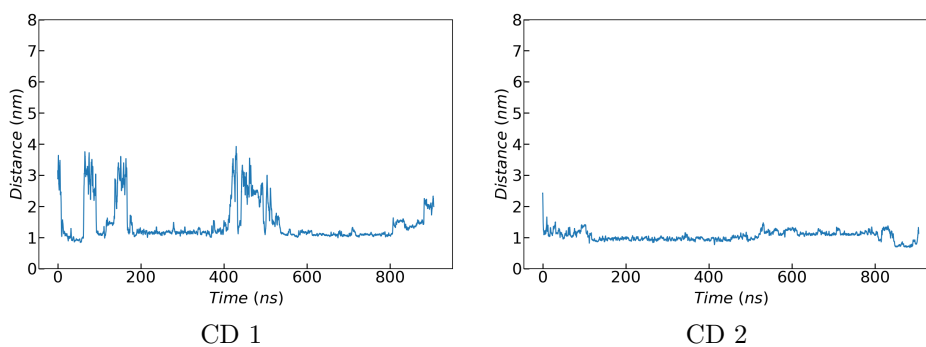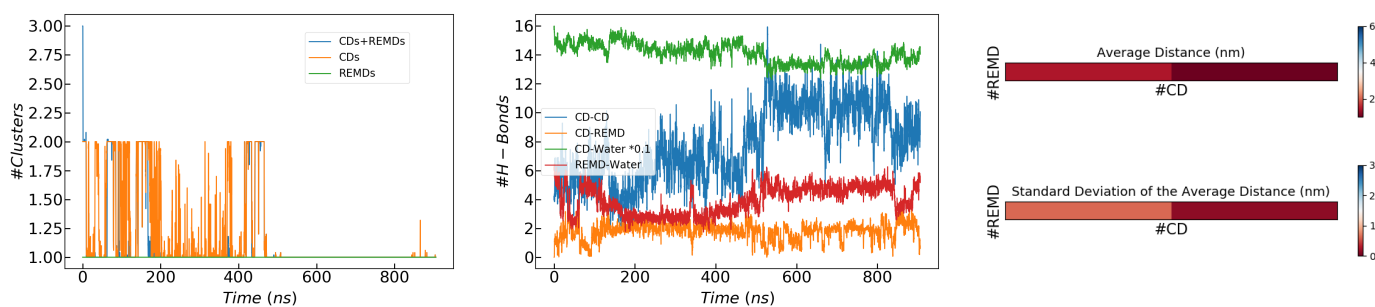

Snapshots taken from the last conformation:

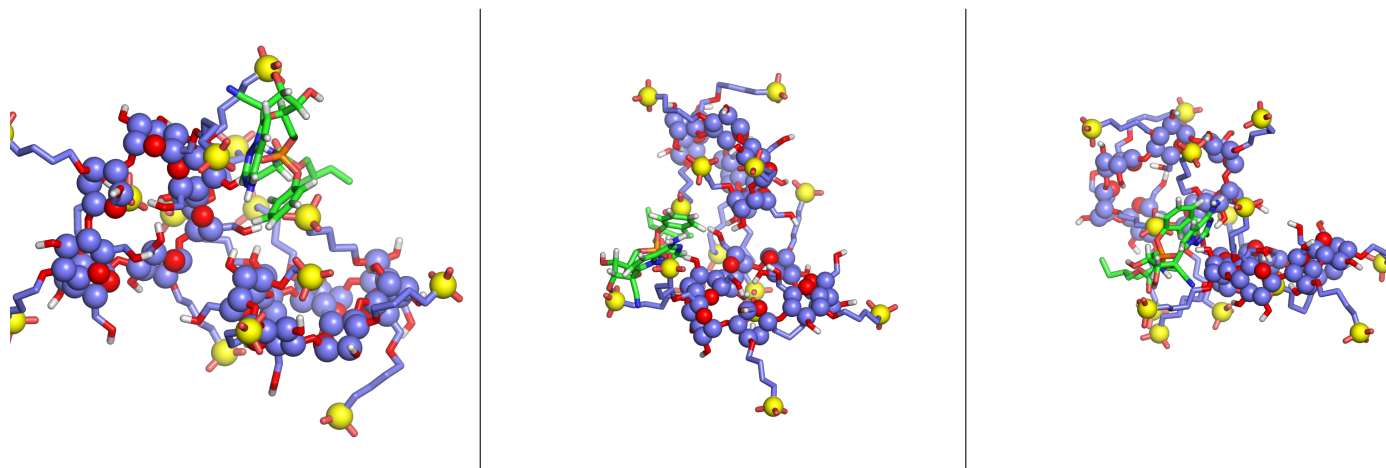

# 20 x 5SBE + 1 x Neutral Remdesivir

Distance between cyclodextrins and remdesivir molecules as a function of time:

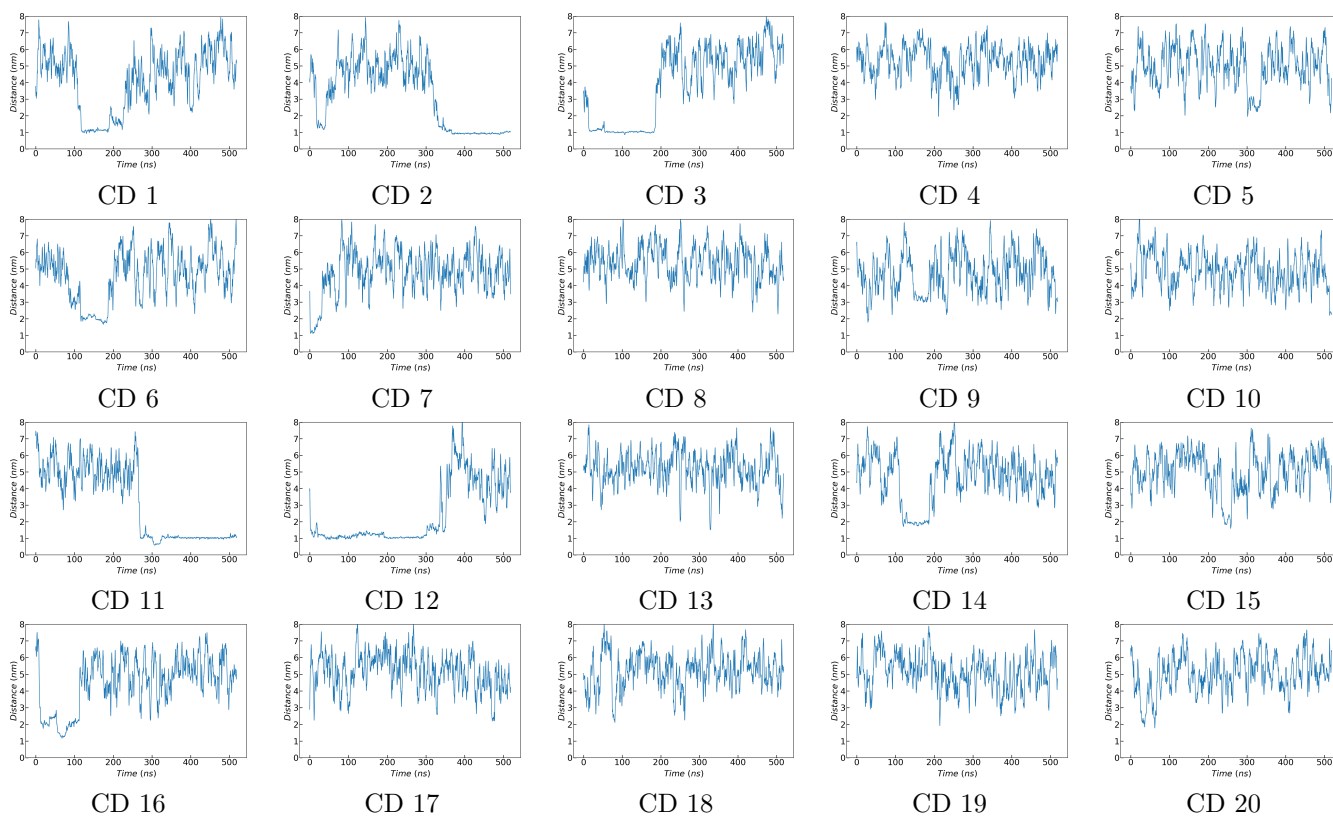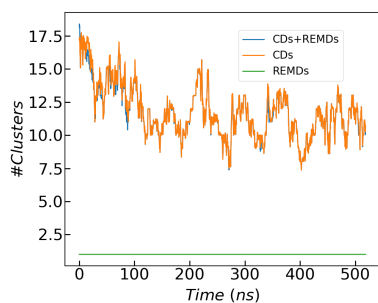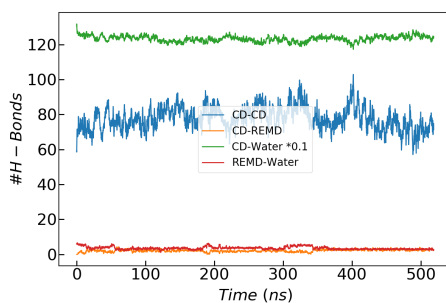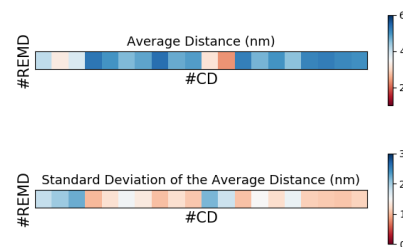

Snapshots taken from the last conformation:

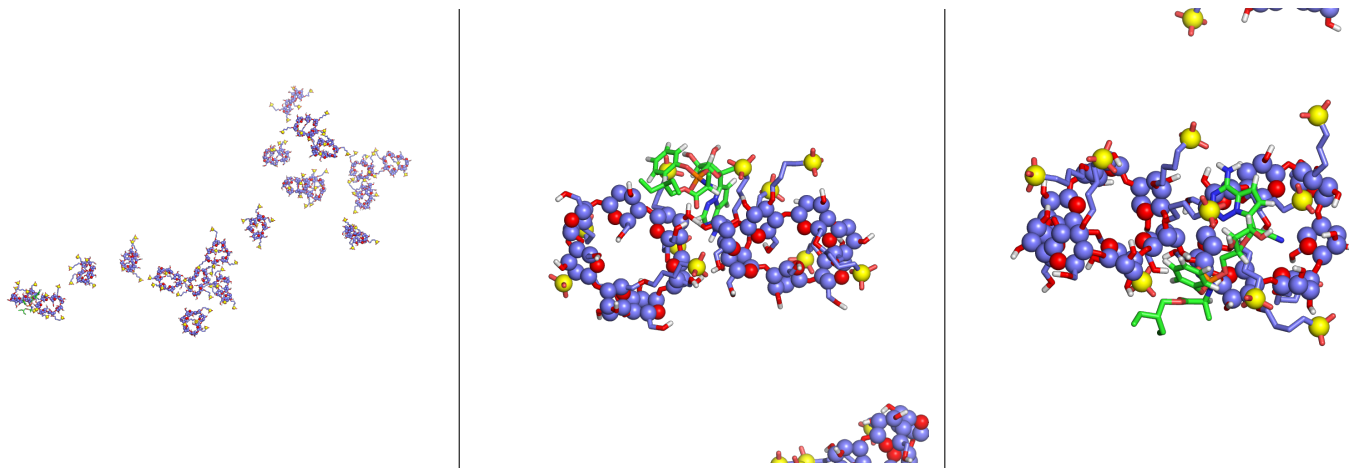

# 20 x 5SBE + 2 x Neutral Remdesivir

Distance between cyclodextrins and remdesivir molecules as a function of time:

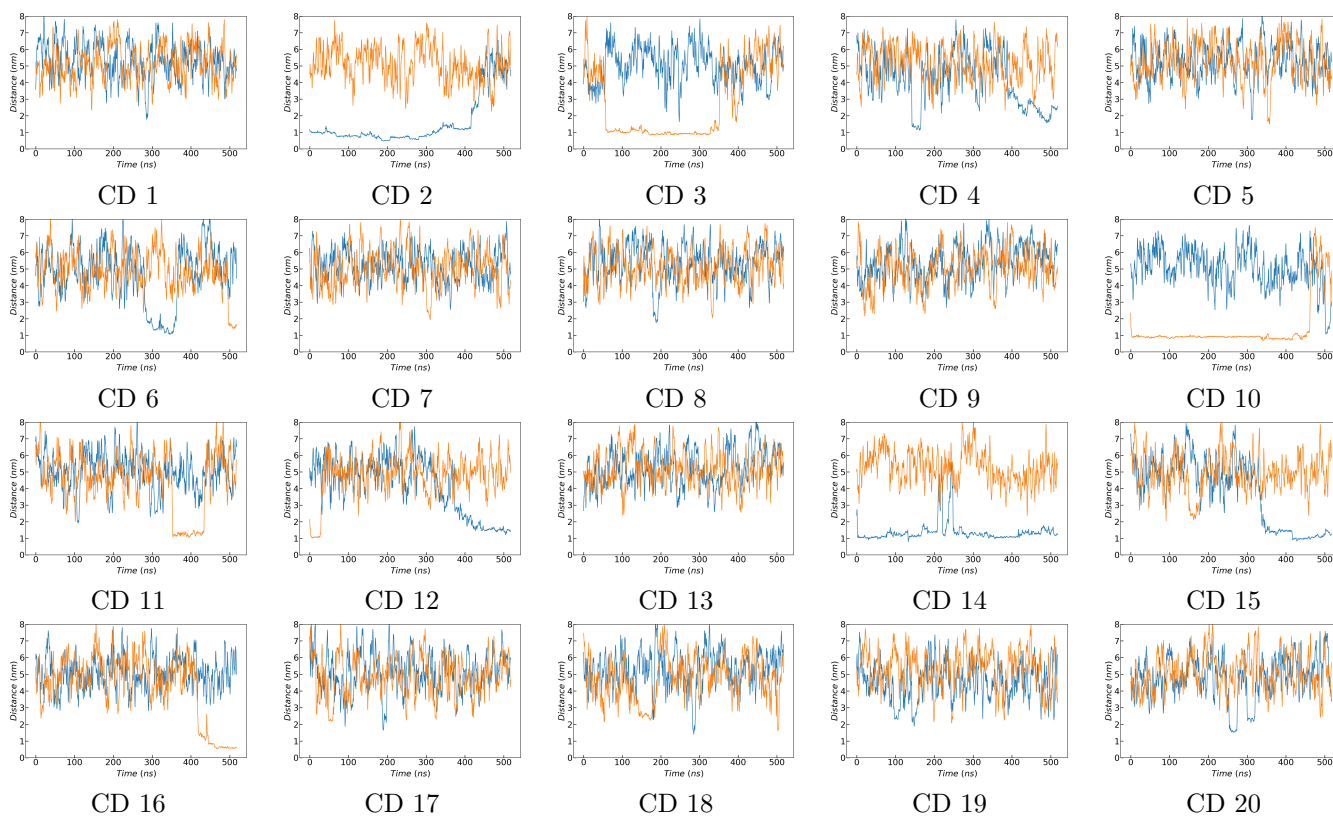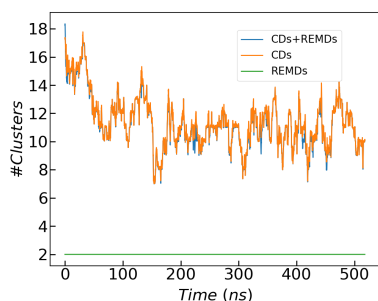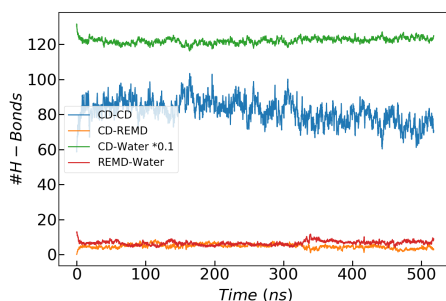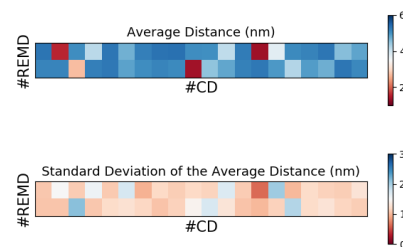

Snapshots taken from the last conformation:

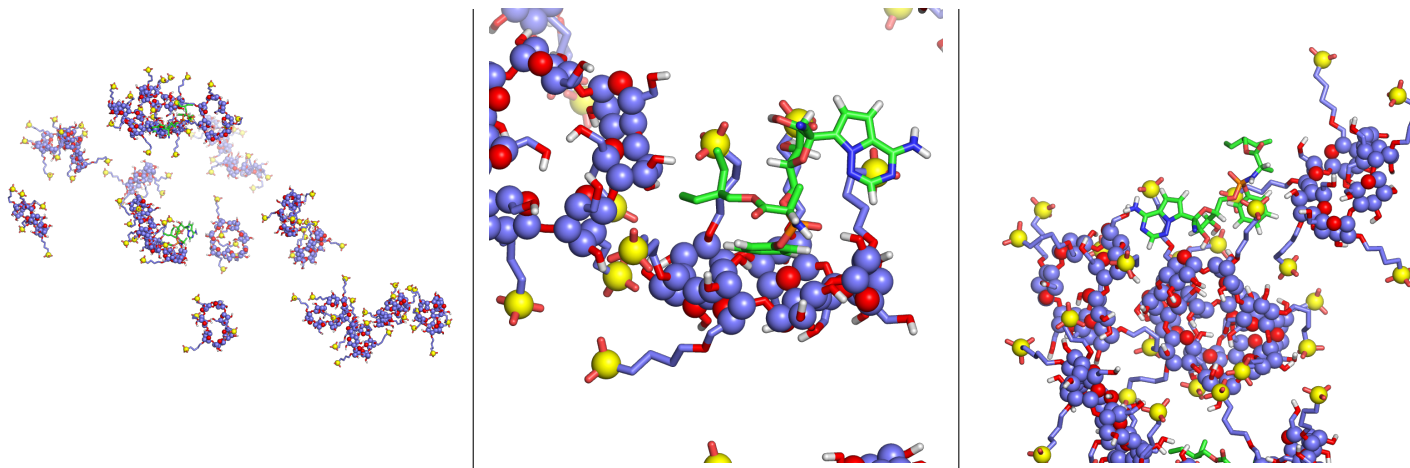



# 20 x 5SBE + 4 x Neutral Remdesivir

Distance between cyclodextrins and remdesivir molecules as a function of time:

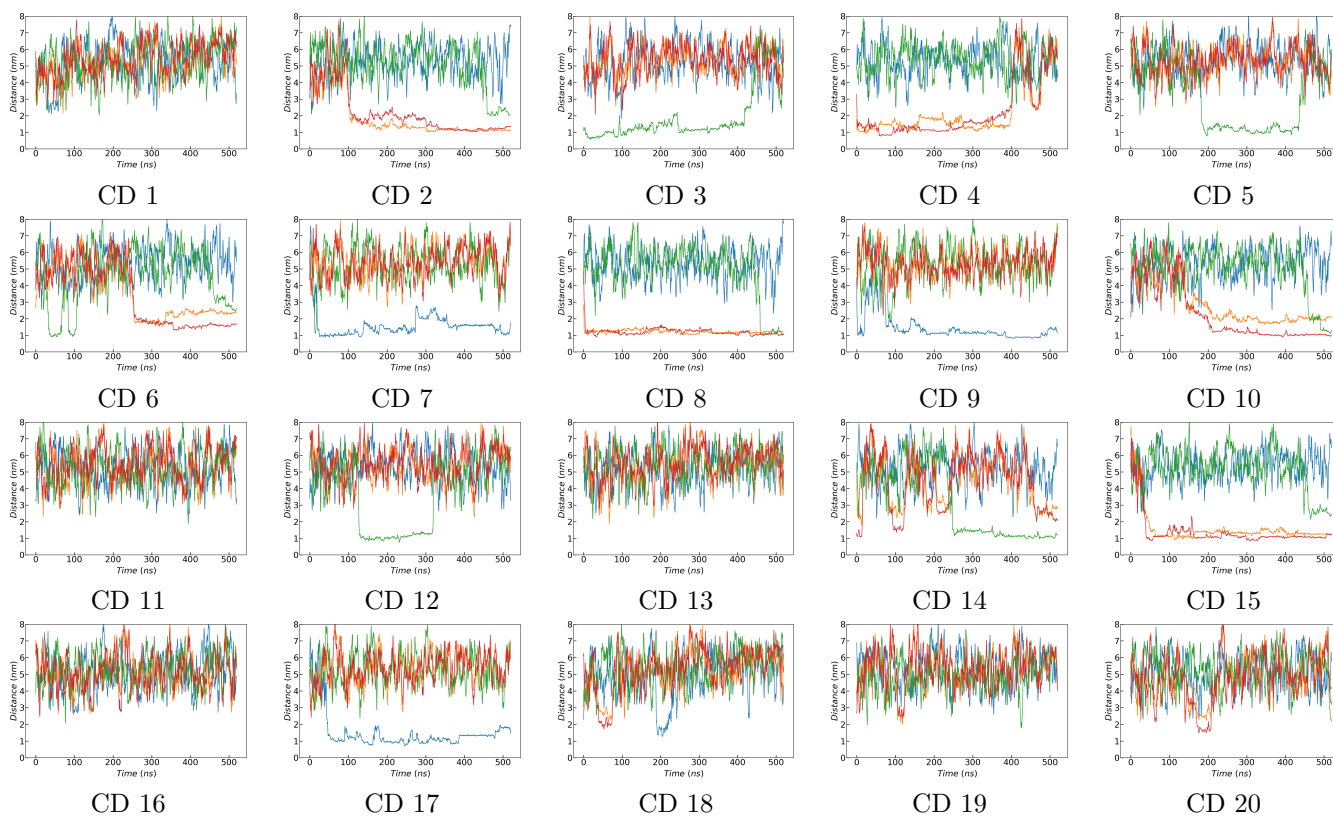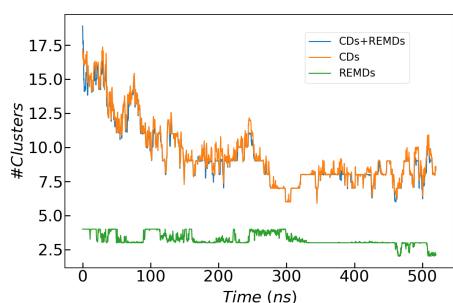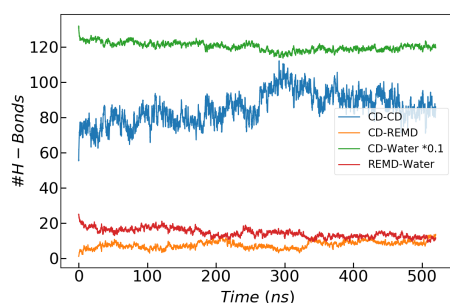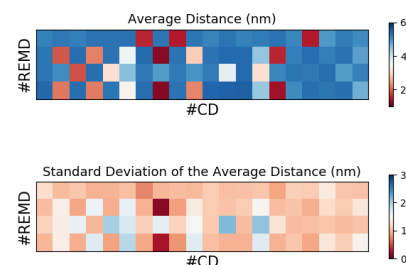

Snapshots taken from the last conformation:

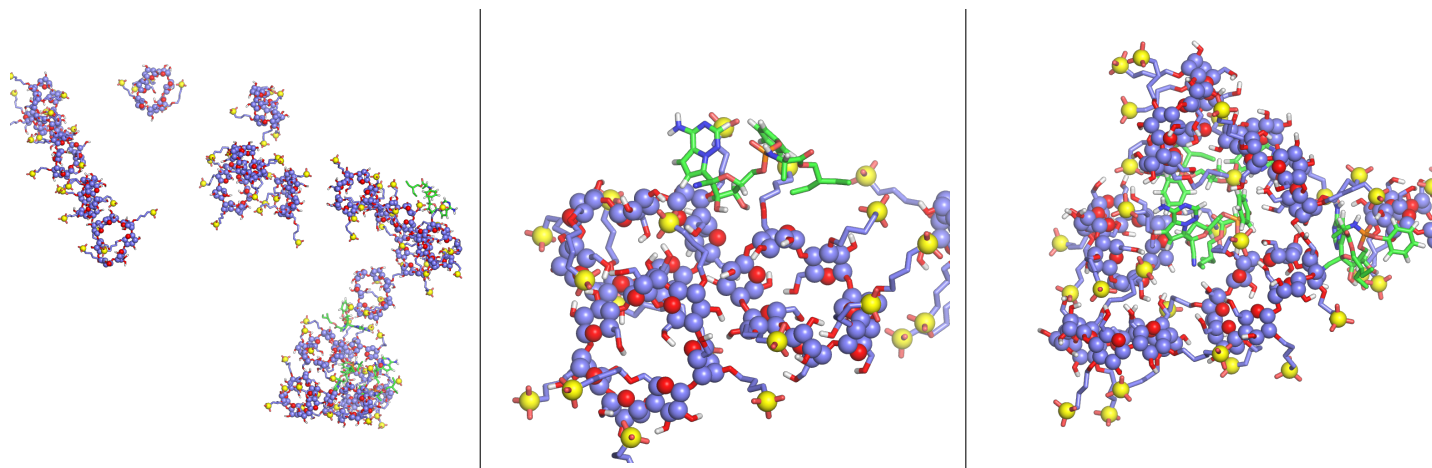

# 20 x 5SBE + 8 x Neutral Remdesivir

Distance between cyclodextrins and remdesivir molecules as a function of time:

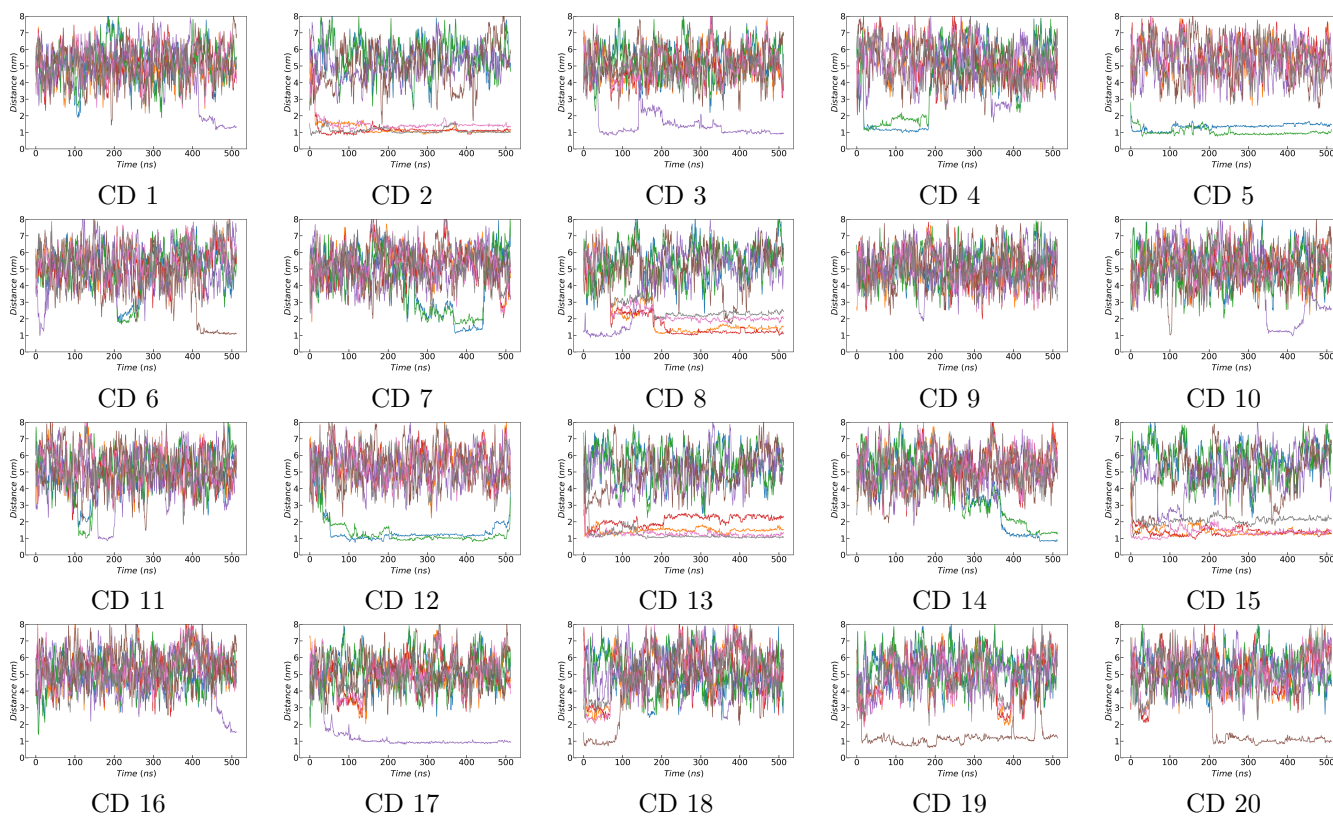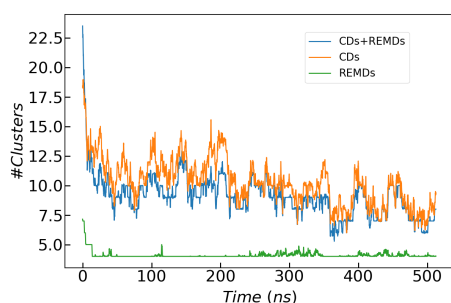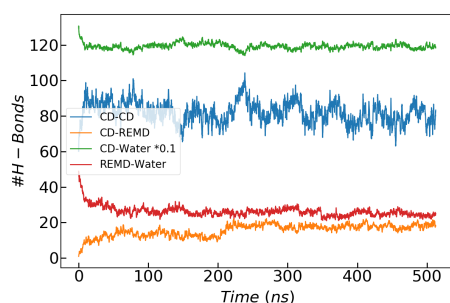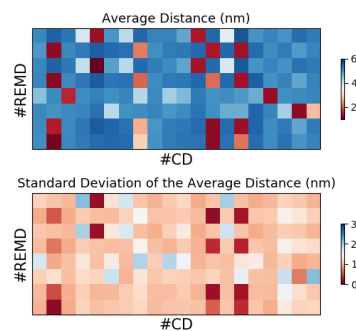

Snapshots taken from the last conformation:

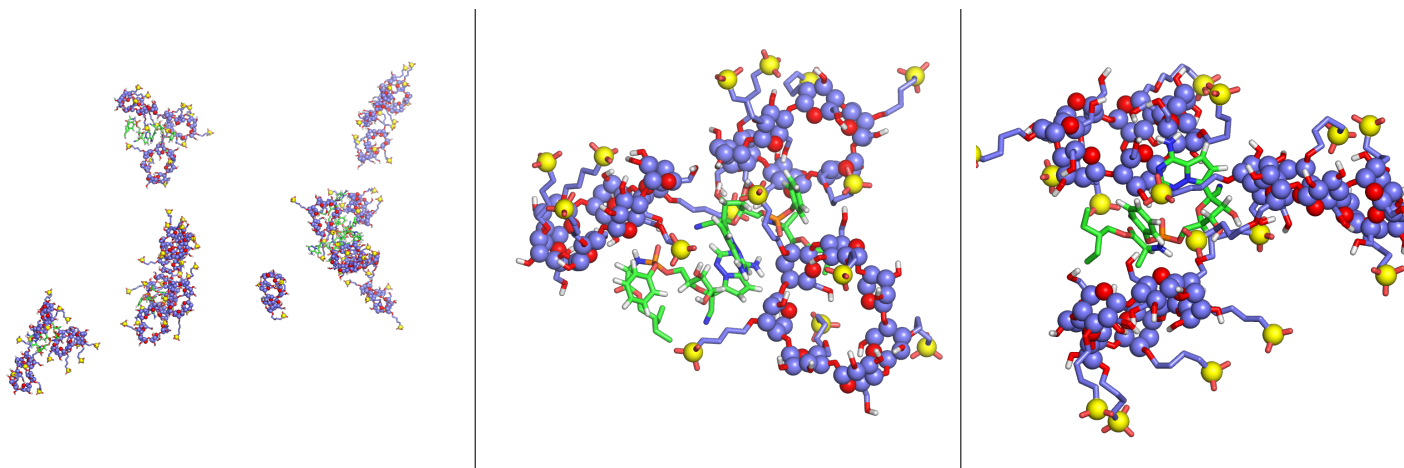



# 20 x 5SBE + 1 x Protonated Remdesivir

Distance between cyclodextrins and remdesivir molecules as a function of time:

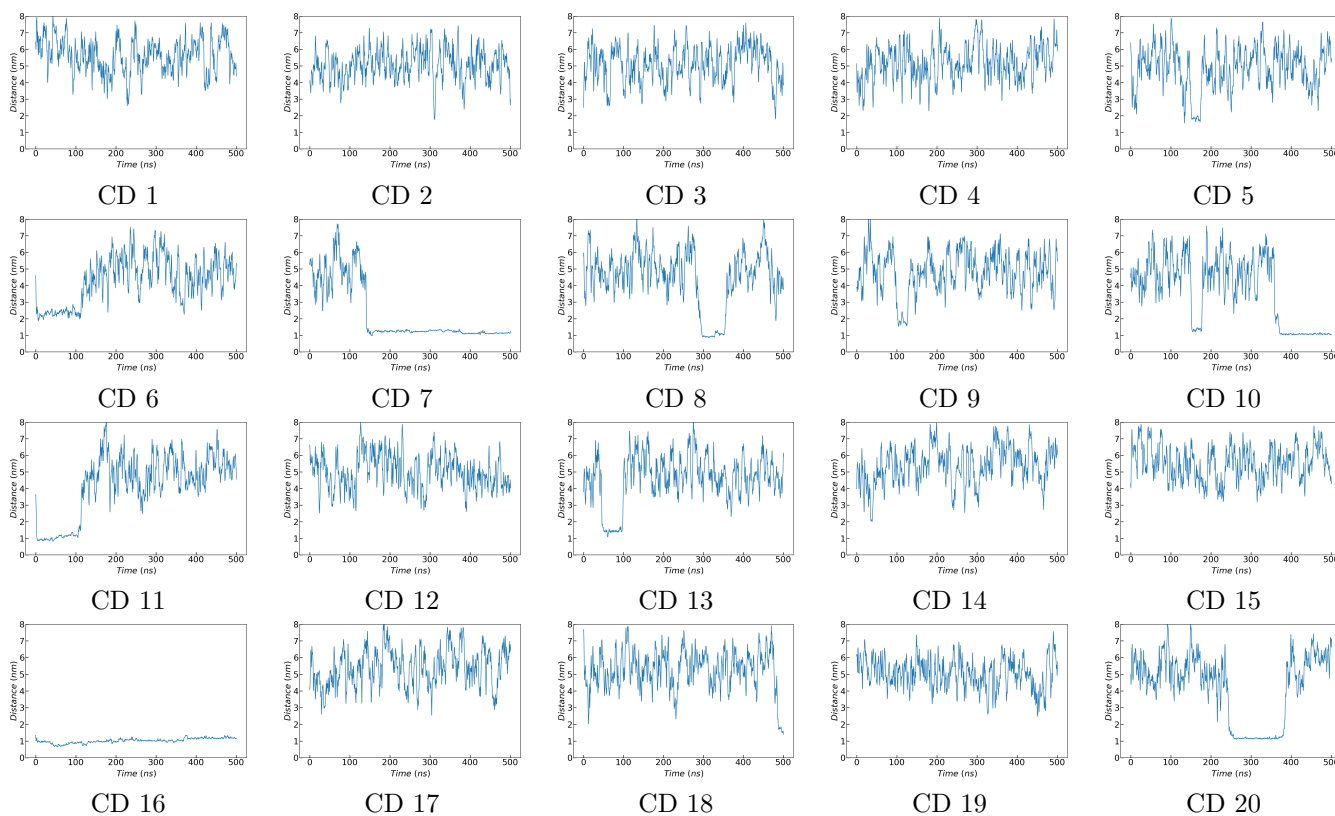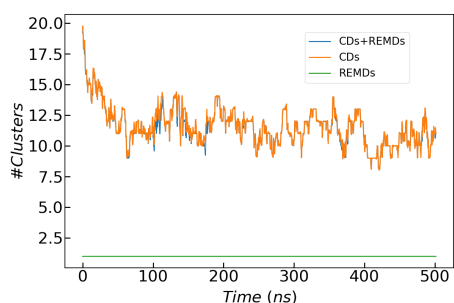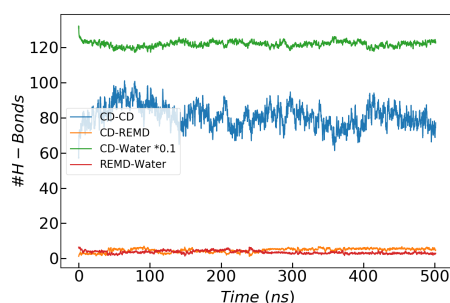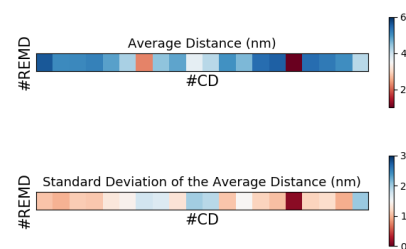

Snapshots taken from the last conformation:

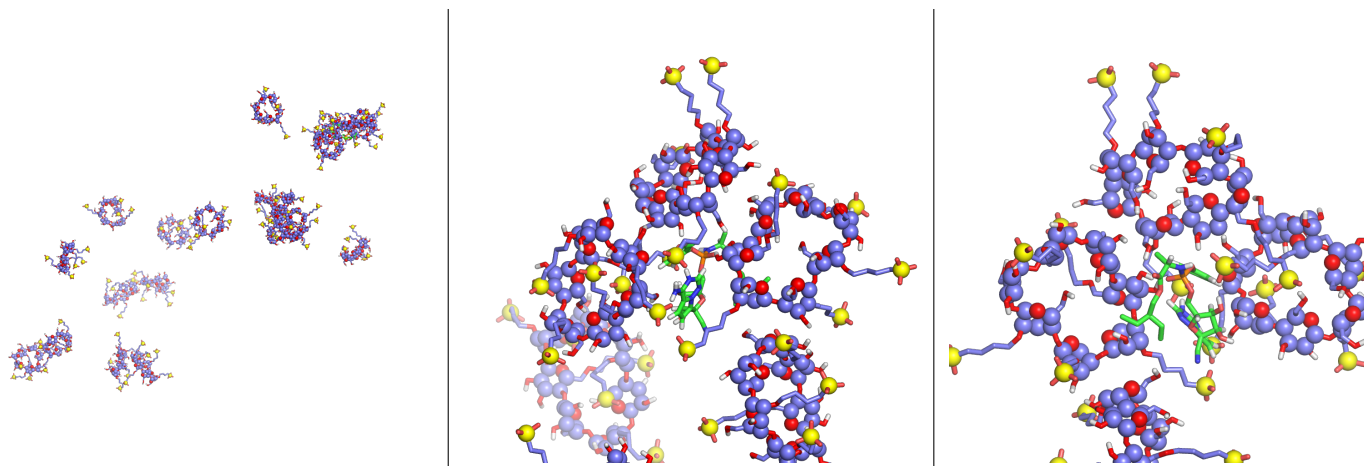

# 20 x 5SBE + 2 x Protonated Remdesivir

Distance between cyclodextrins and remdesivir molecules as a function of time:

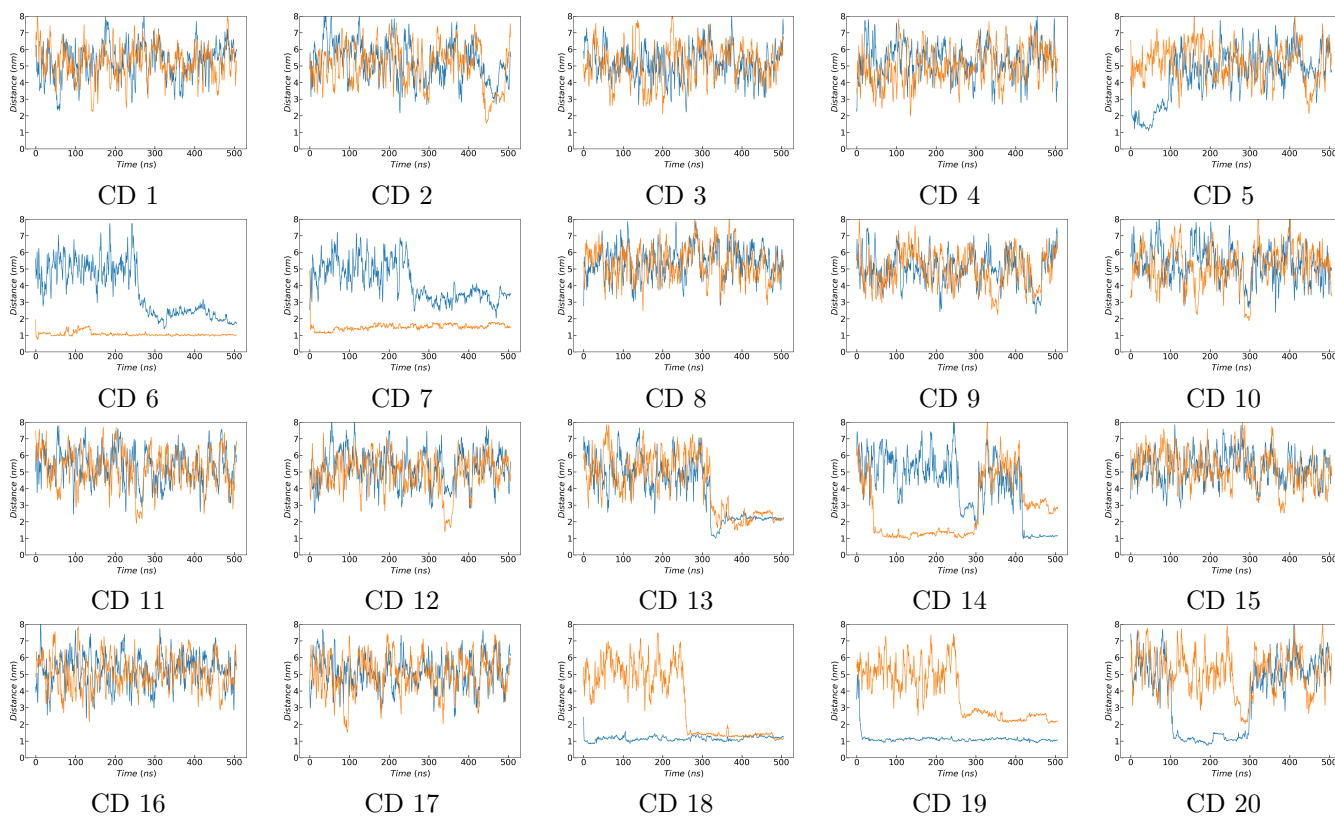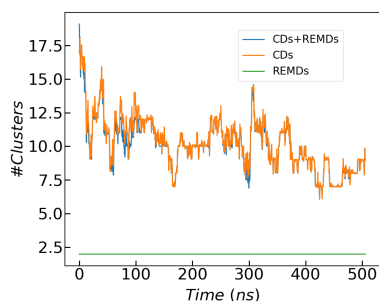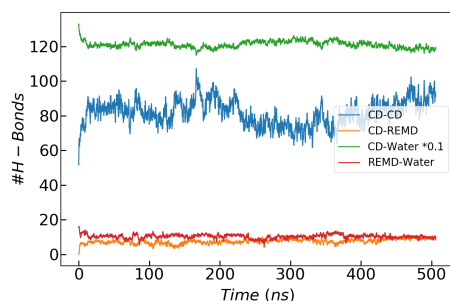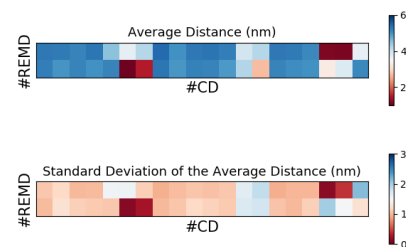

Snapshots taken from the last conformation:

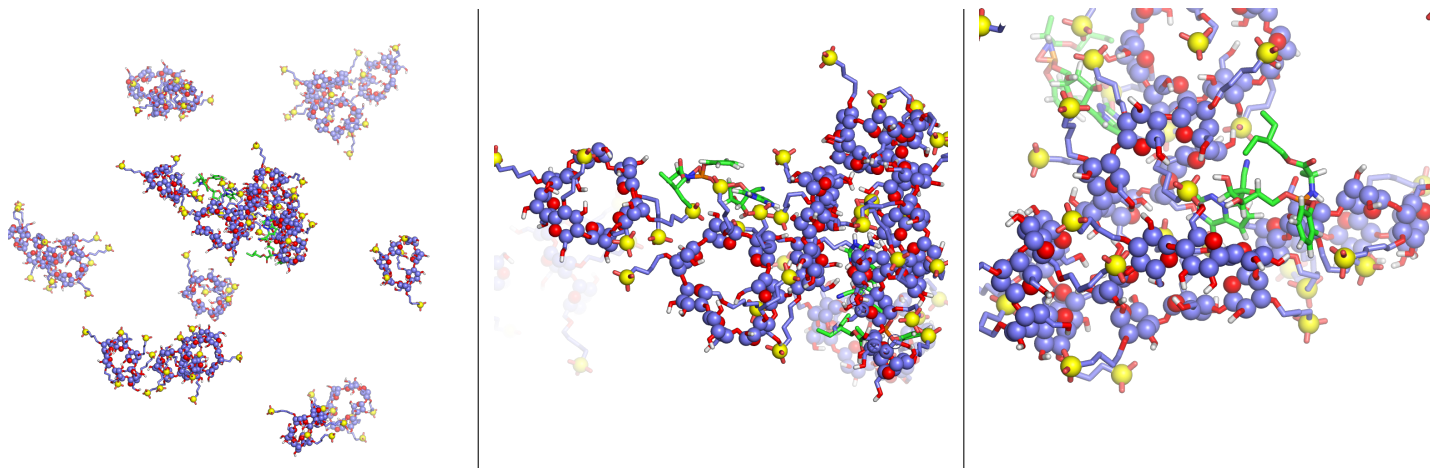

# 20 x 5SBE + 4 x Protonated Remdesivir

Distance between cyclodextrins and remdesivir molecules as a function of time:

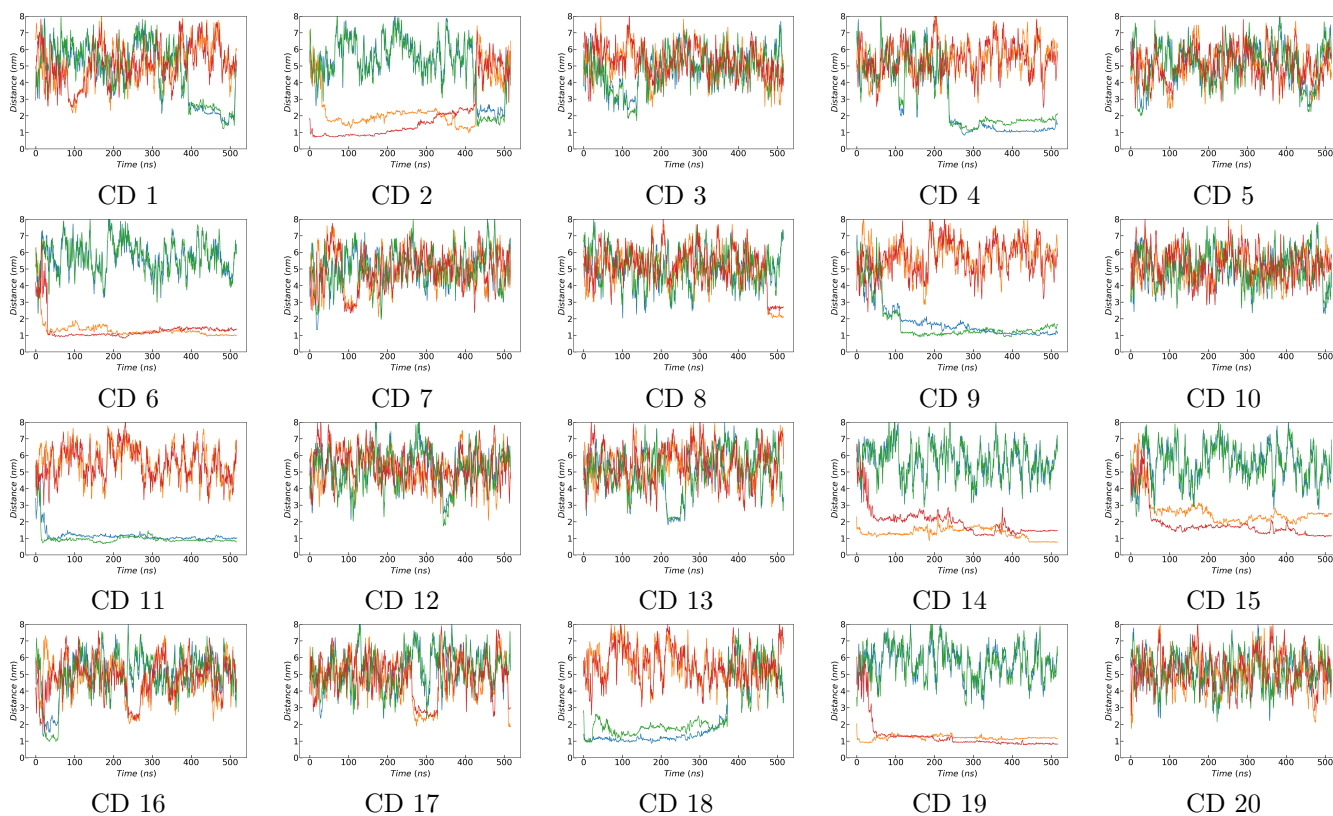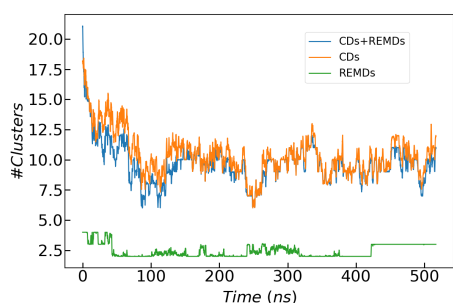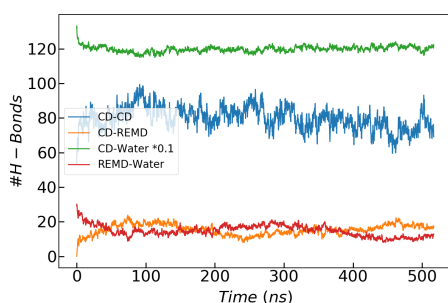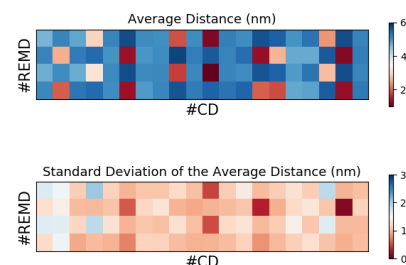

Snapshots taken from the last conformation:

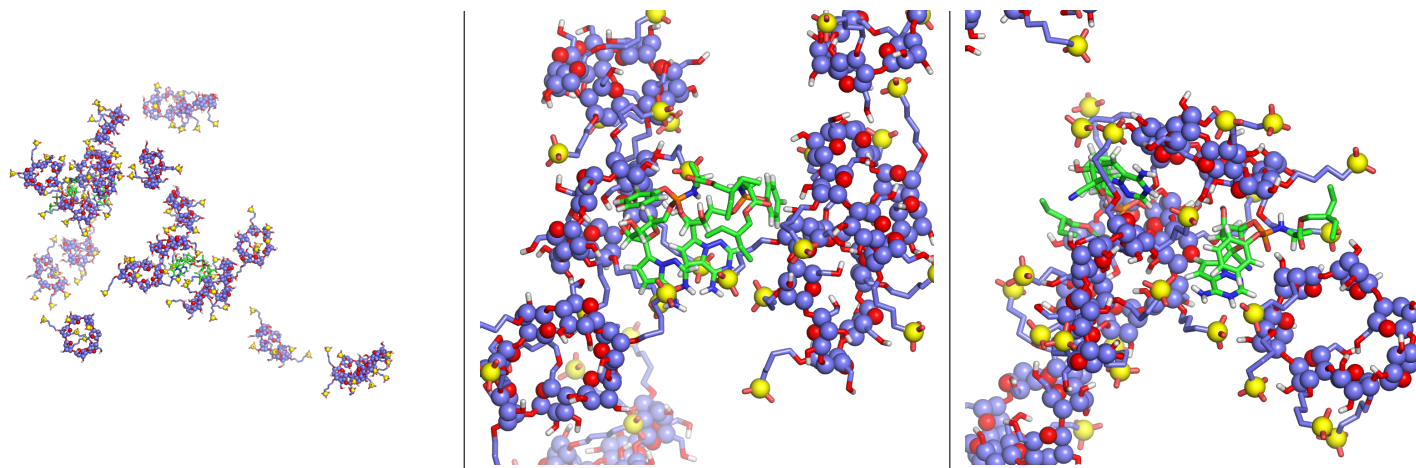



# 20 x 5SBE + 8 x Protonated Remdesivir

Distance between cyclodextrins and remdesivir molecules as a function of time:

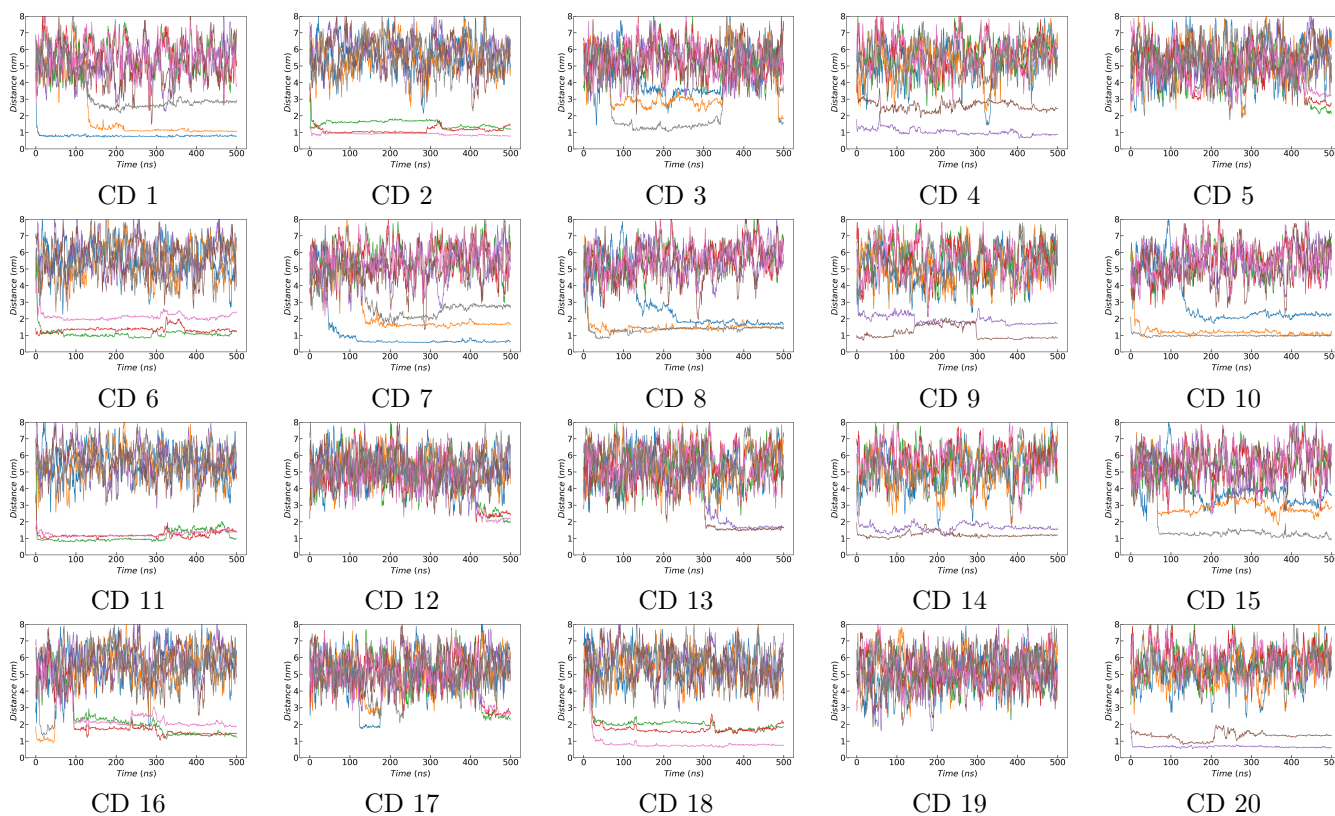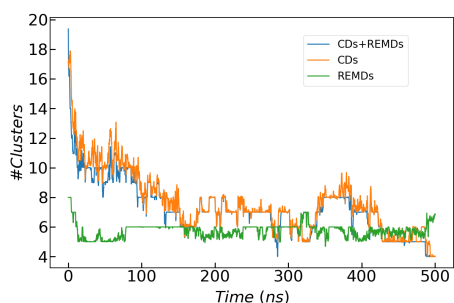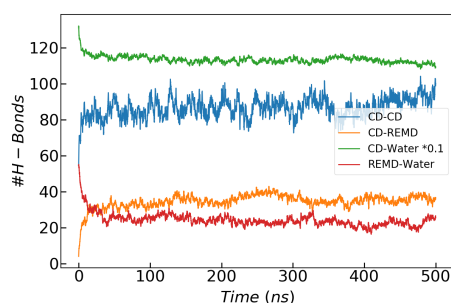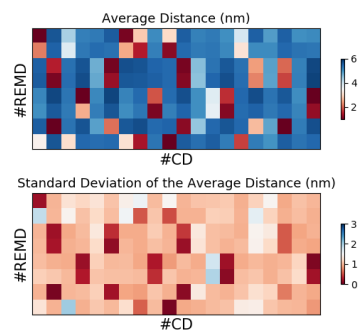

Snapshots taken from the last conformation:

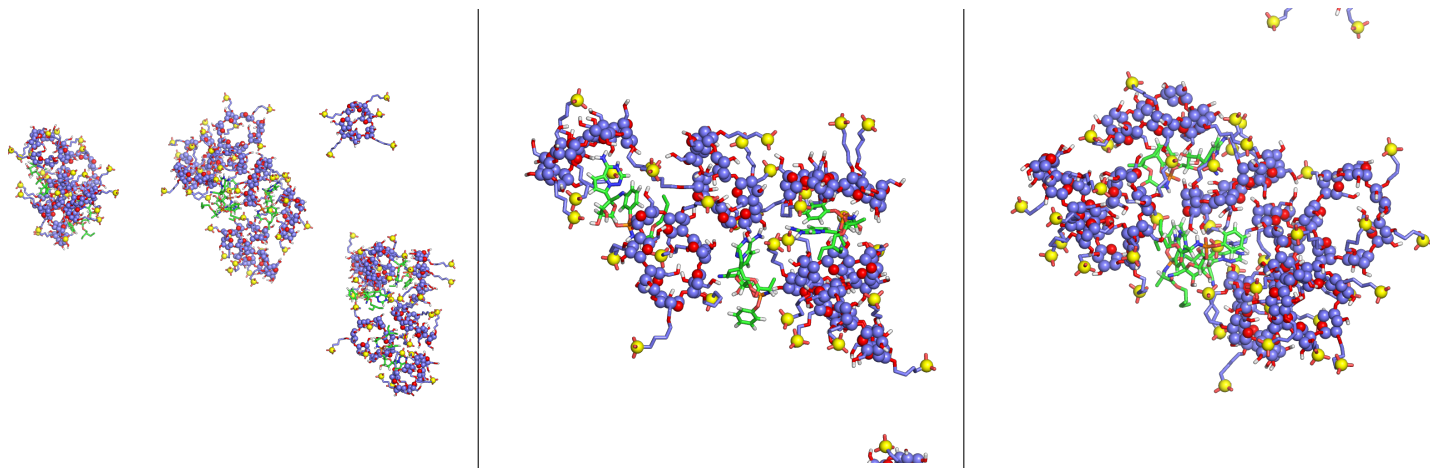

# 20 x 6SBE + 1 x Neutral Remdesivir

Distance between cyclodextrins and remdesivir molecules as a function of time:

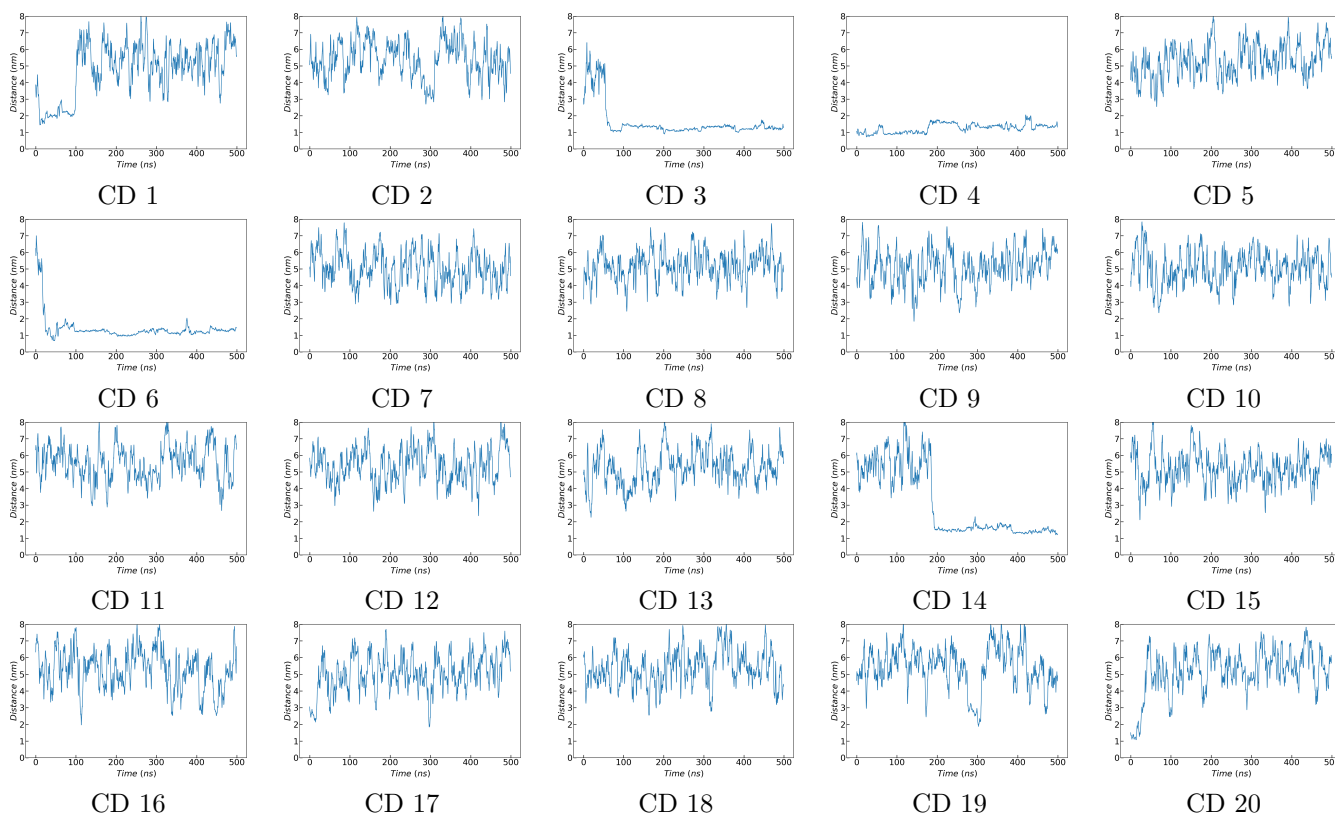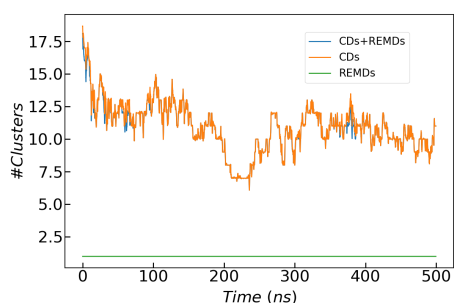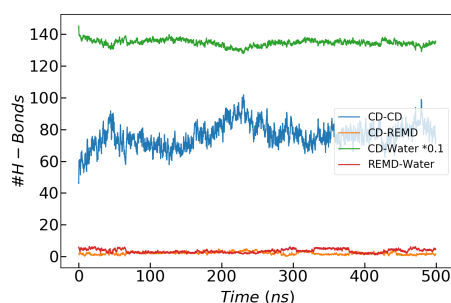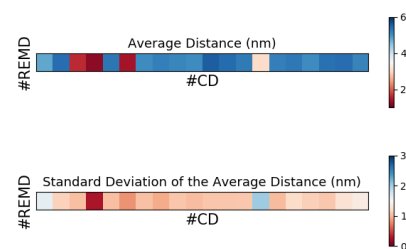

Snapshots taken from the last conformation:

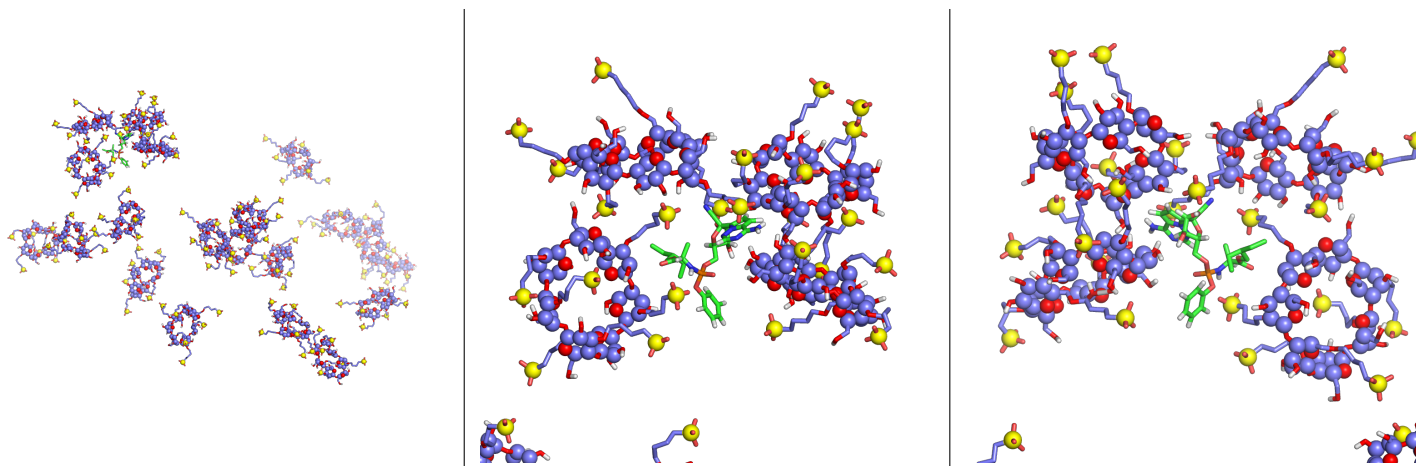

# 20 x 6SBE + 2 x Neutral Remdesivir

Distance between cyclodextrins and remdesivir molecules as a function of time:

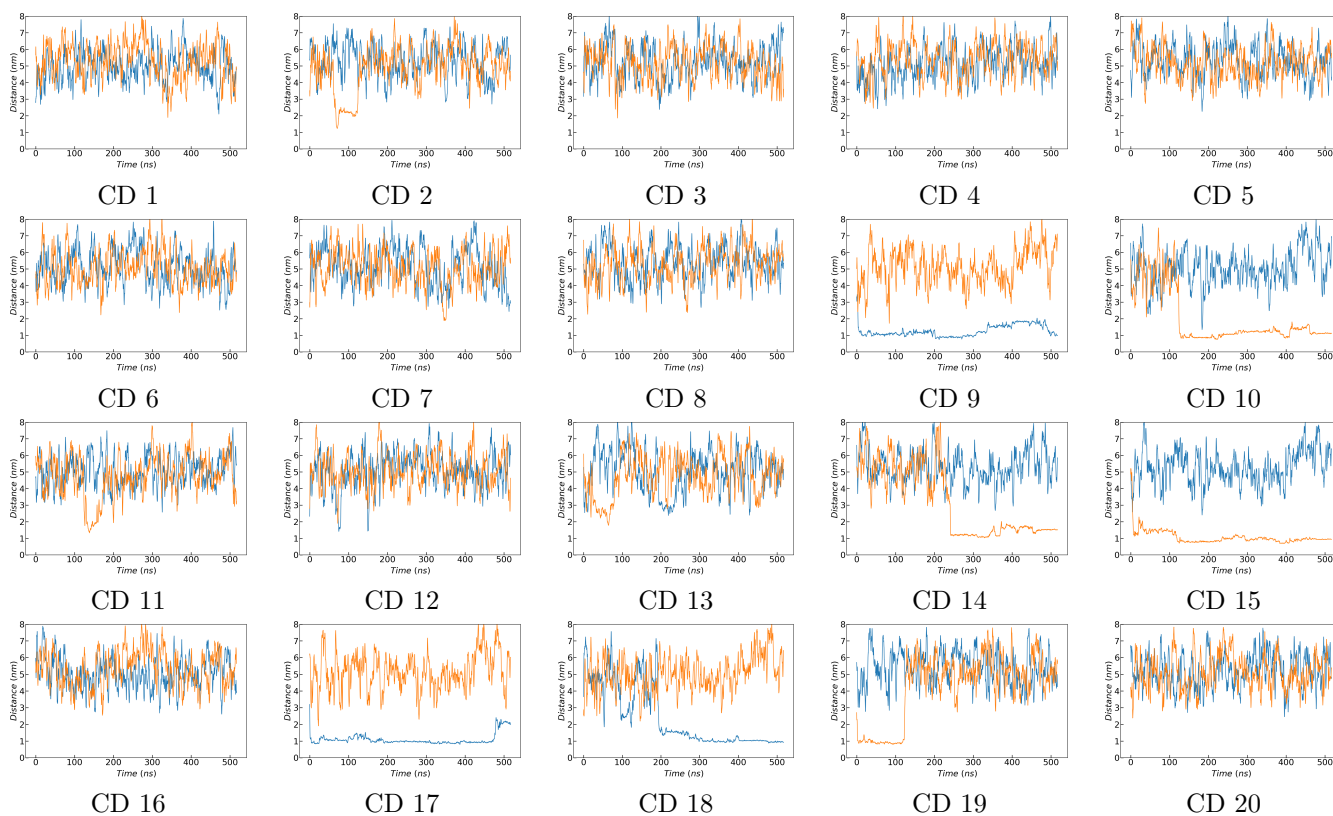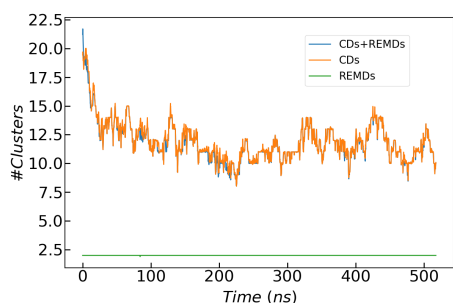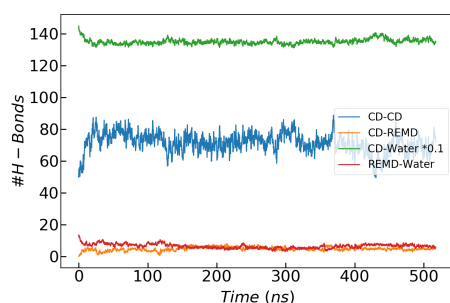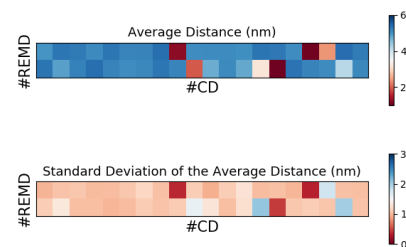

Snapshots taken from the last conformation:

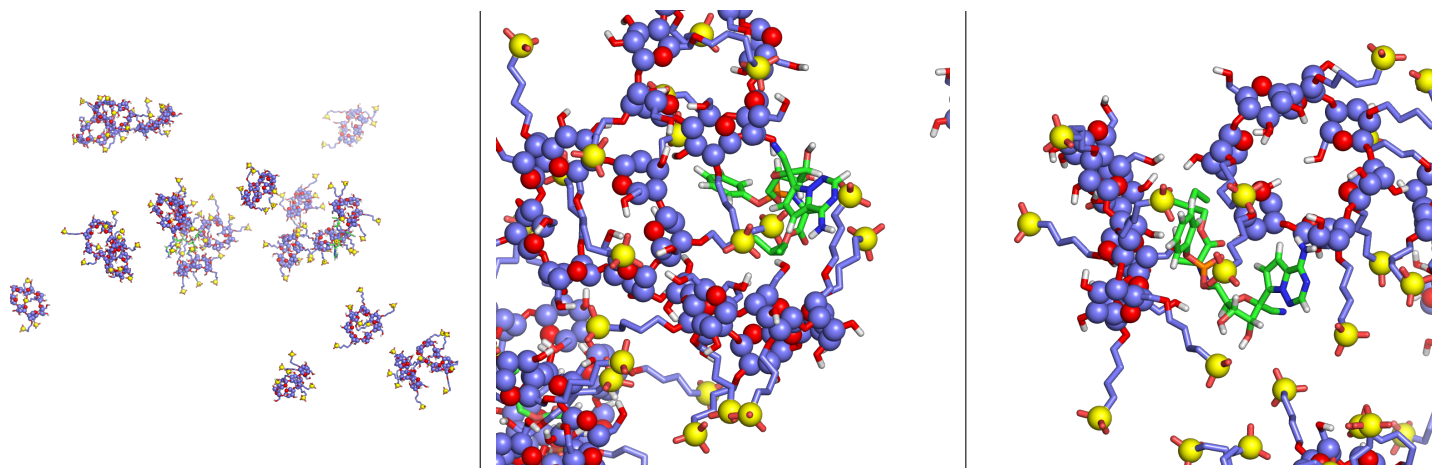



# 20 x 6SBE + 4 x Neutral Remdesivir

Distance between cyclodextrins and remdesivir molecules as a function of time:

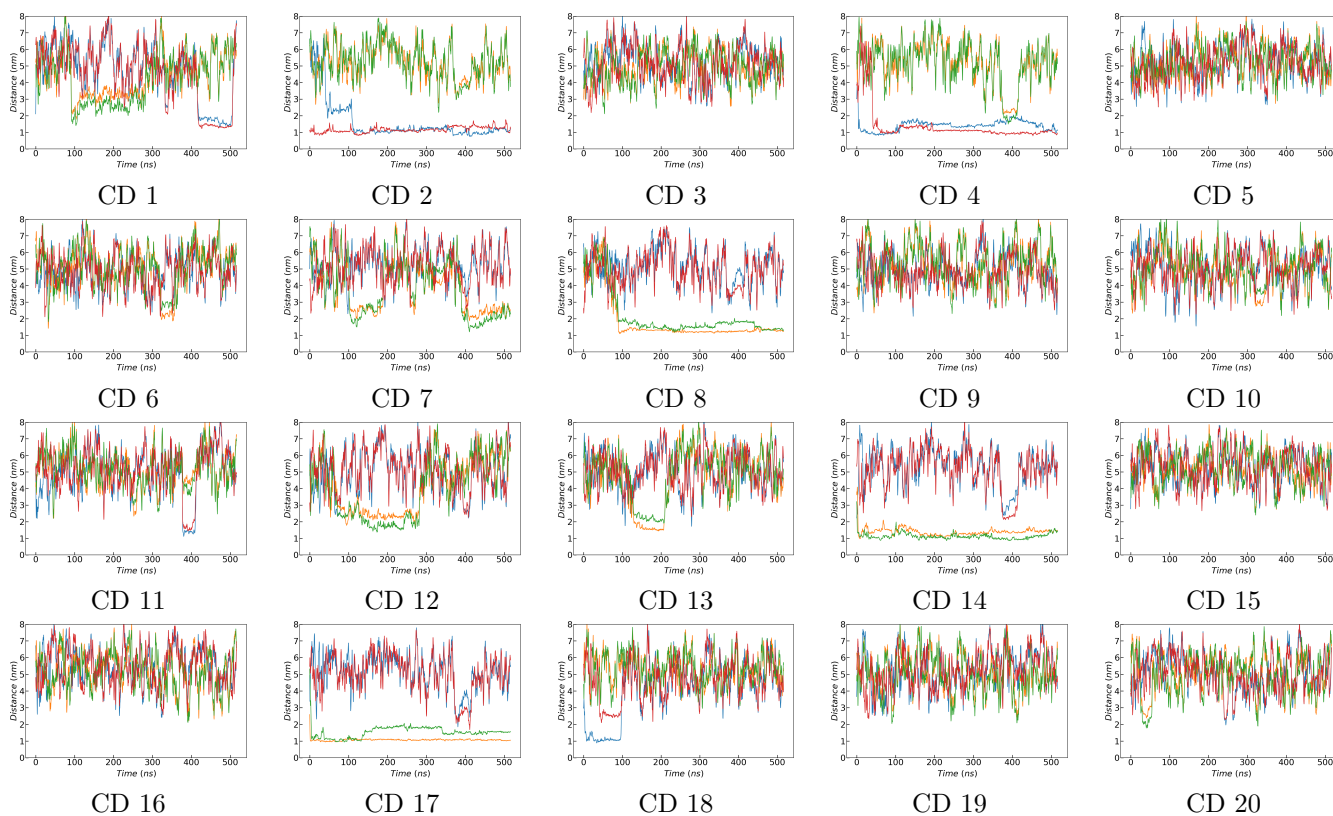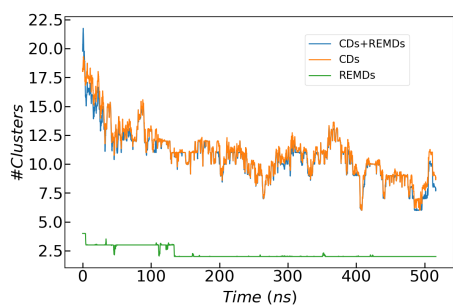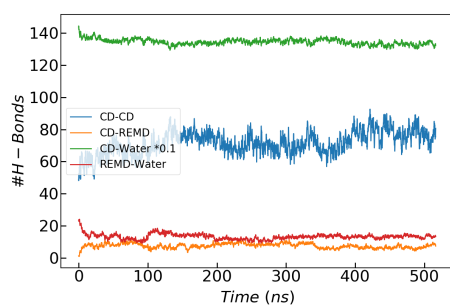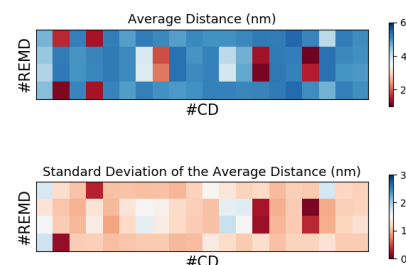

Snapshots taken from the last conformation:

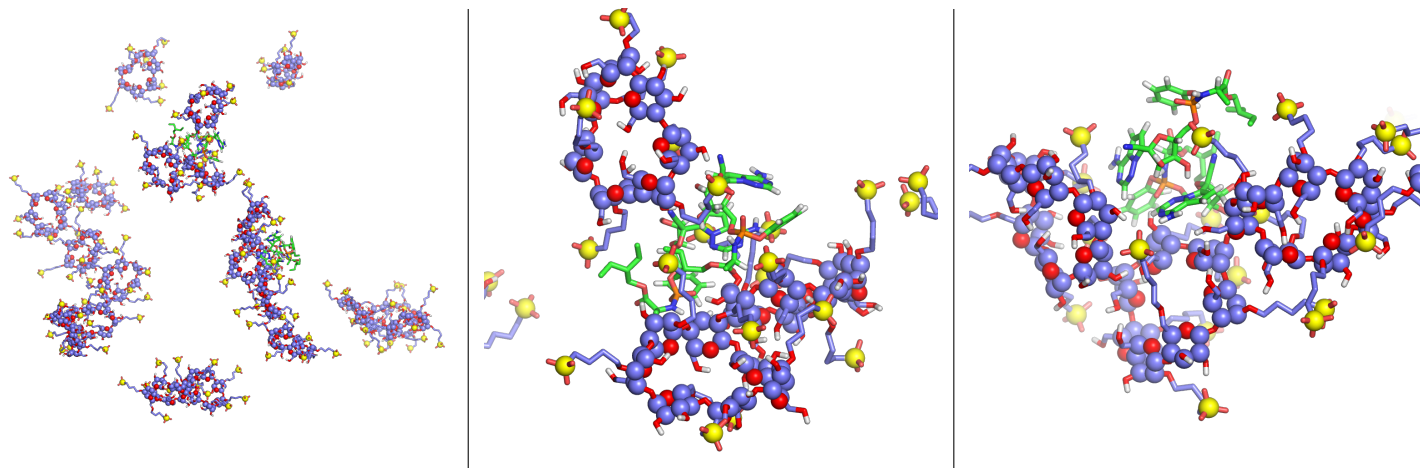

# 20 x 6SBE + 8 x Neutral Remdesivir

Distance between cyclodextrins and remdesivir molecules as a function of time:

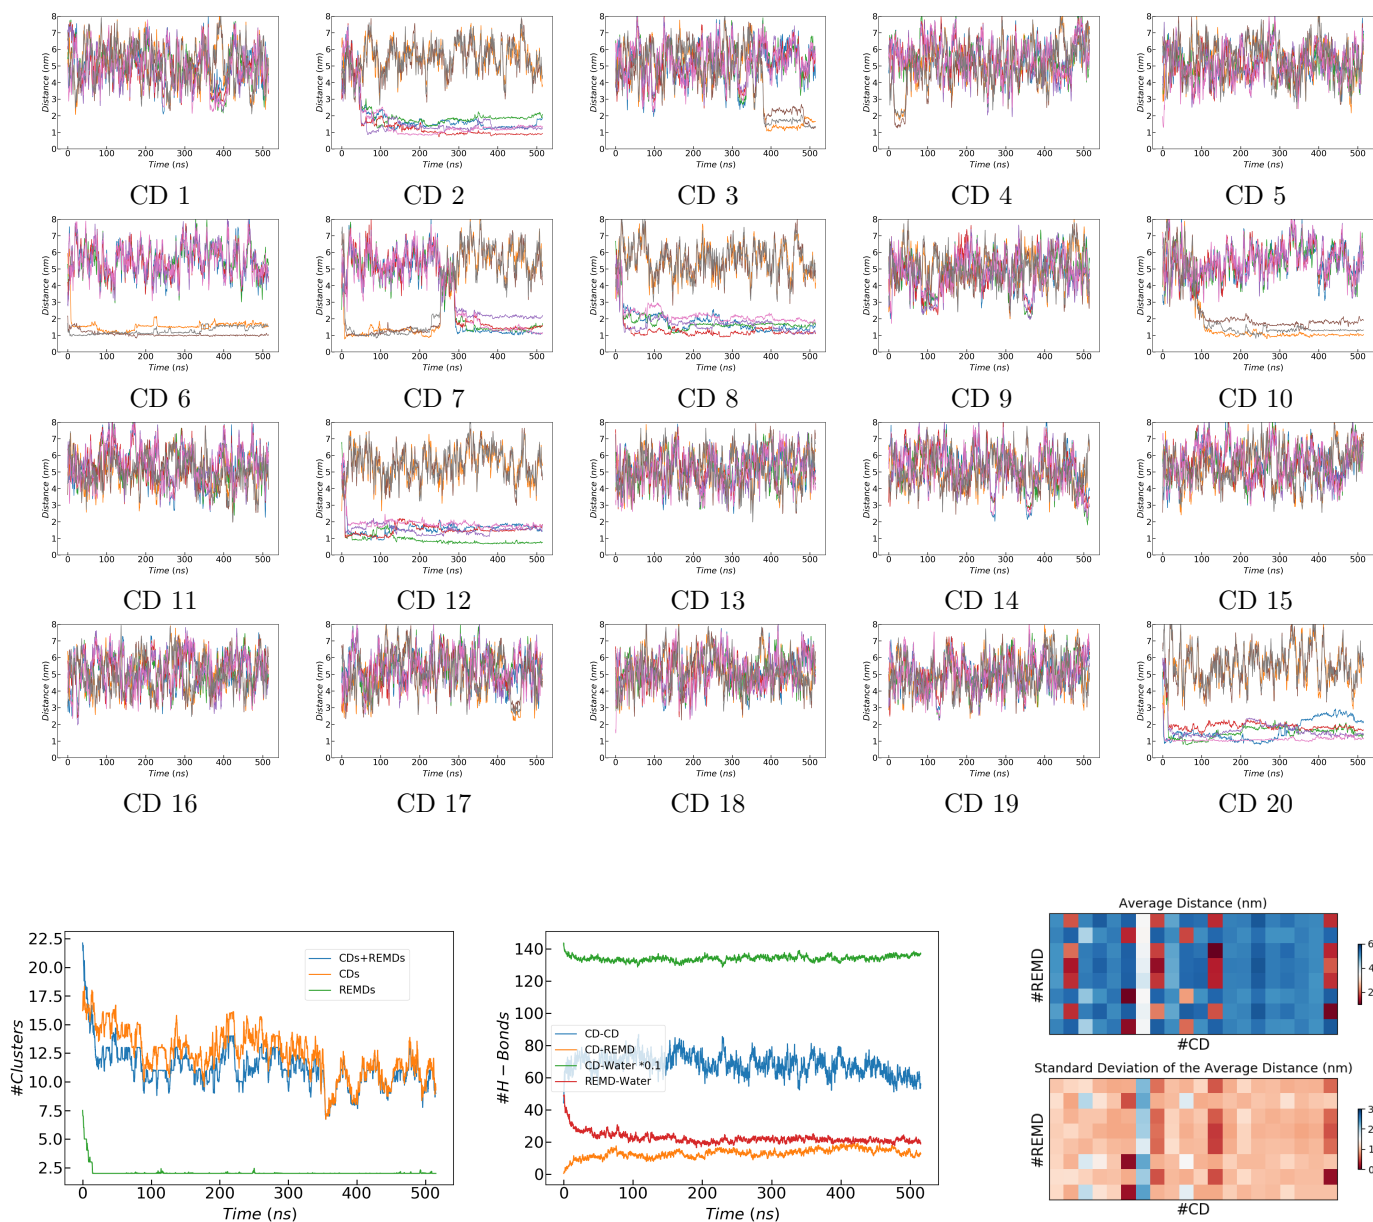

Snapshots taken from the last conformation:

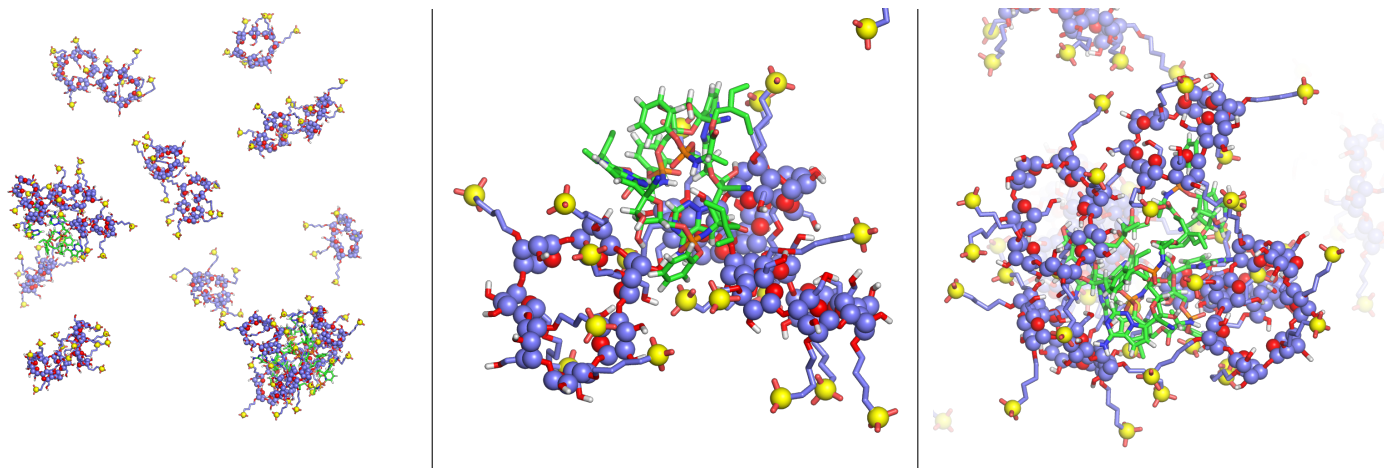



# 20 x 6SBE + 1 x Protonated Remdesivir

Distance between cyclodextrins and remdesivir molecules as a function of time:

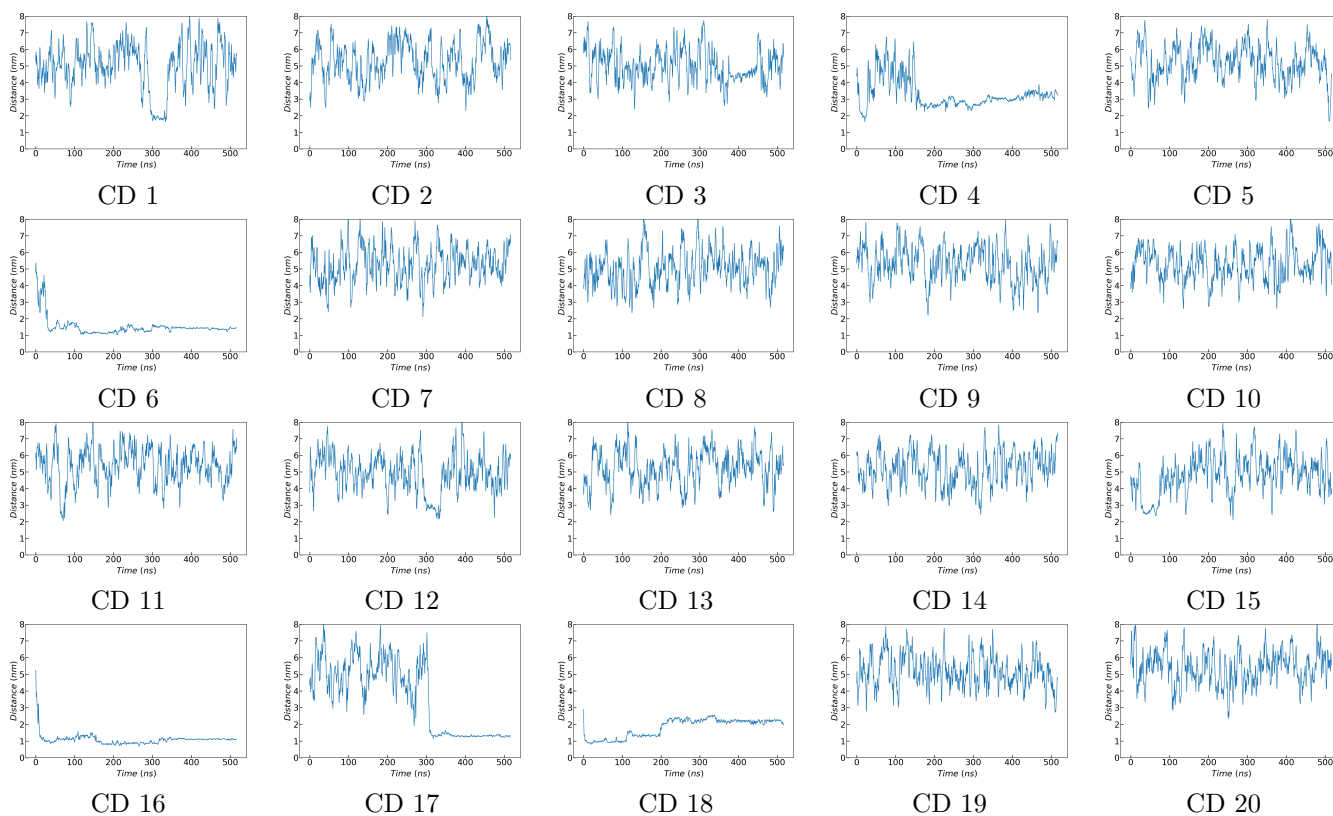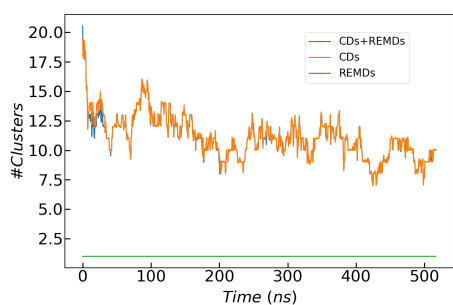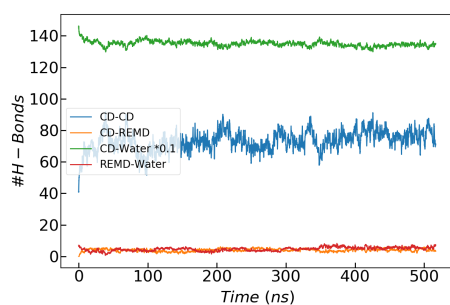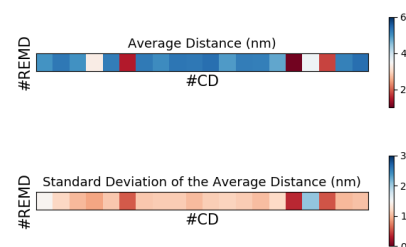

Snapshots taken from the last conformation:

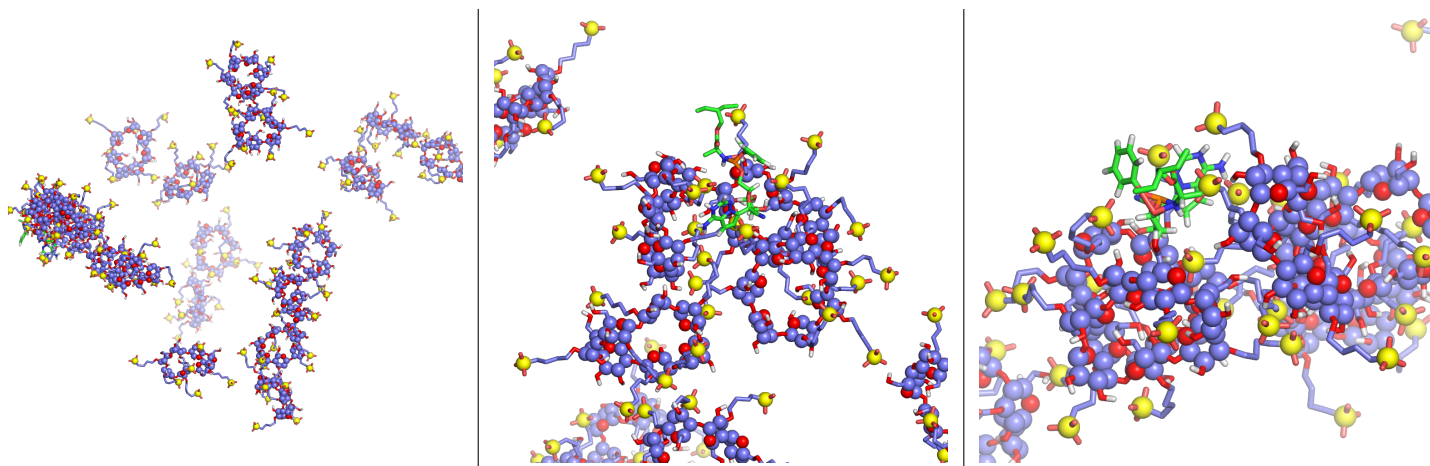

# 20 x 6SBE + 2 x Protonated Remdesivir

Distance between cyclodextrins and remdesivir molecules as a function of time:

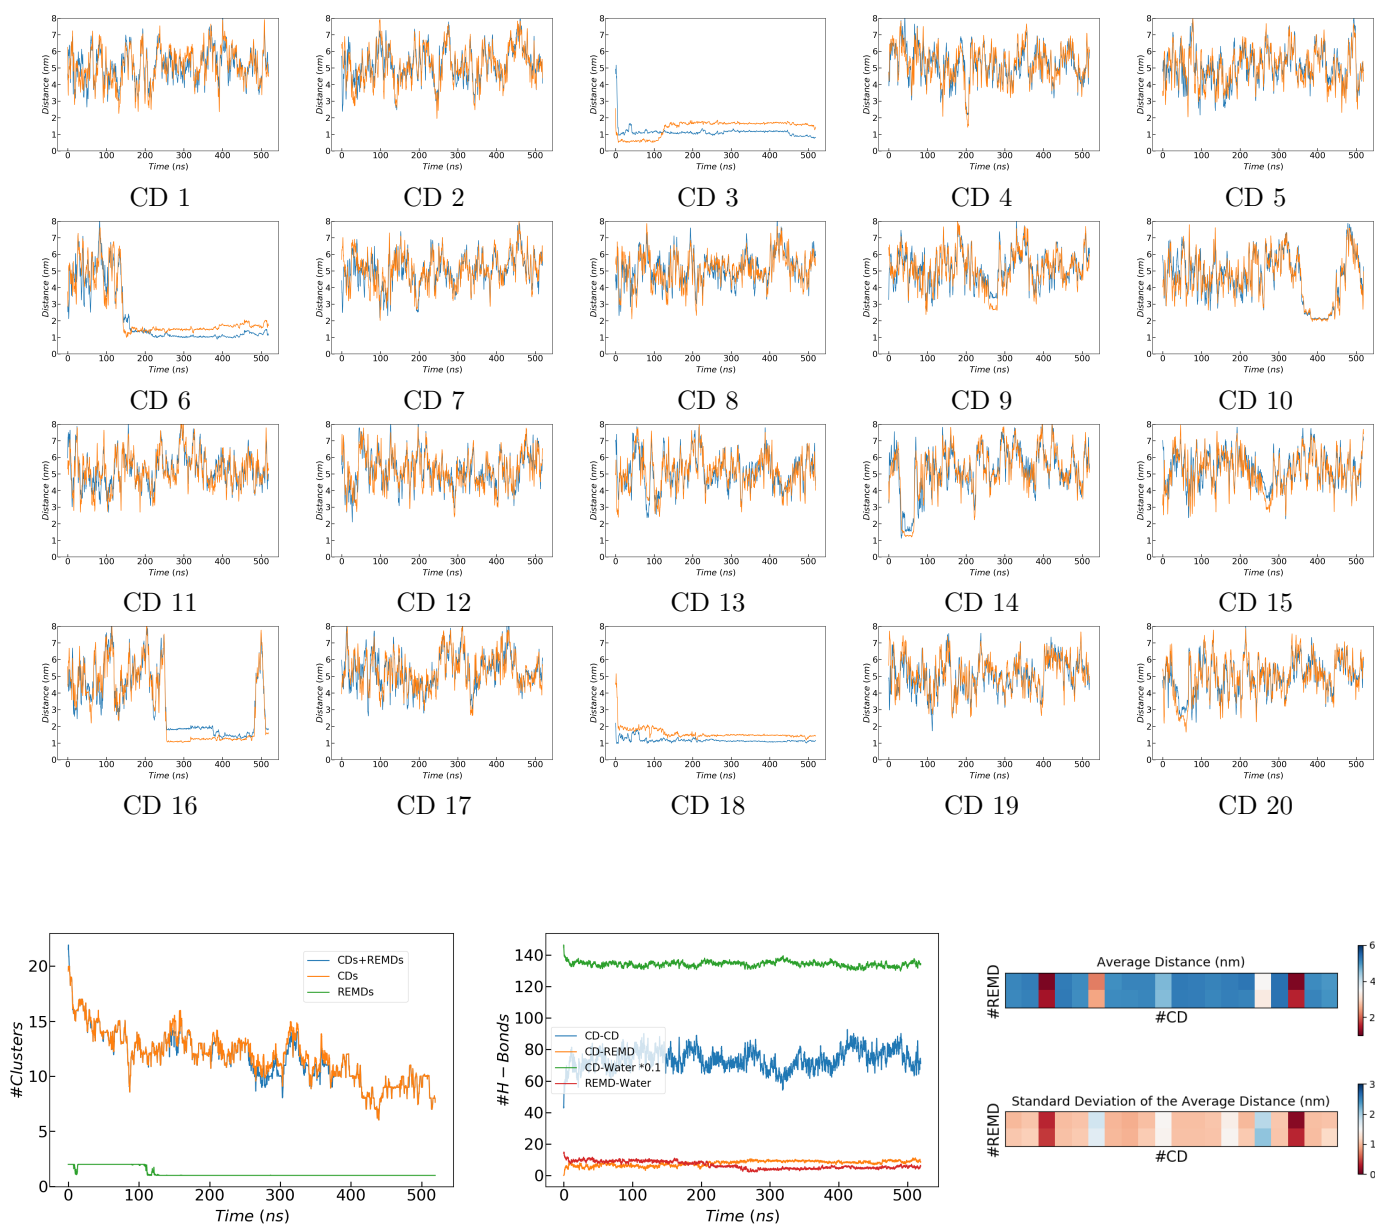

Snapshots taken from the last conformation:

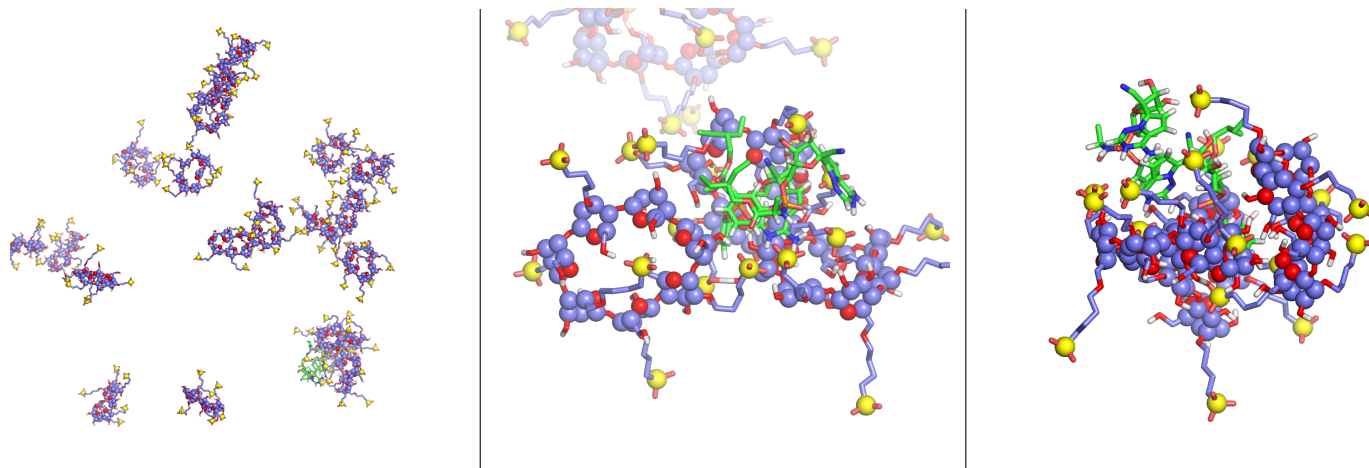

# 20 x 6SBE + 4 x Protonated Remdesivir

Distance between cyclodextrins and remdesivir molecules as a function of time:

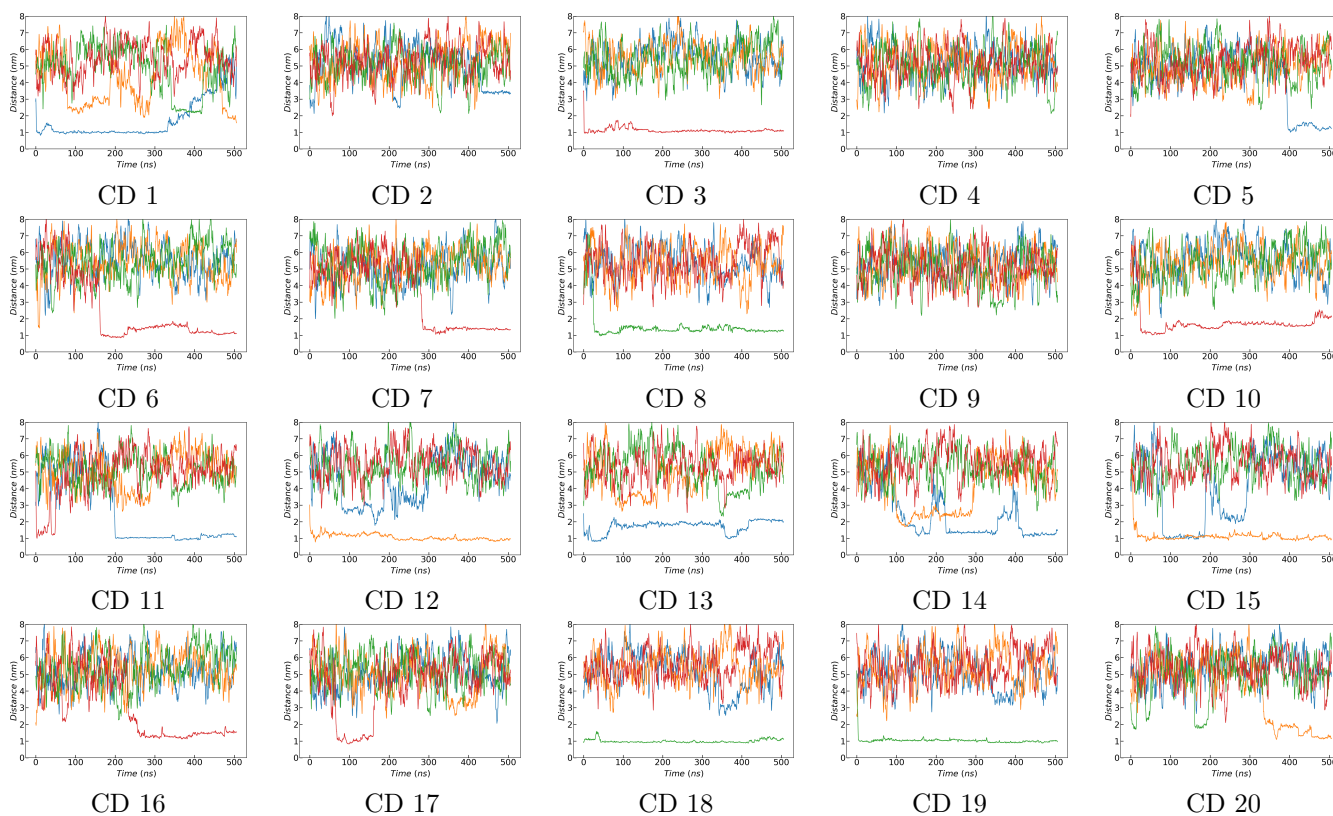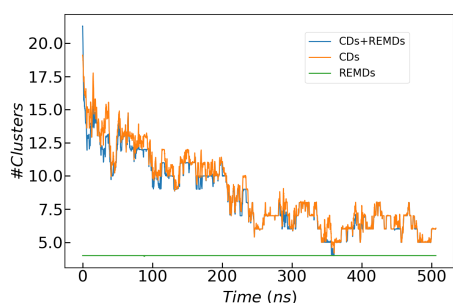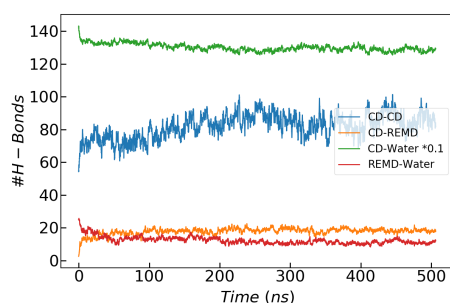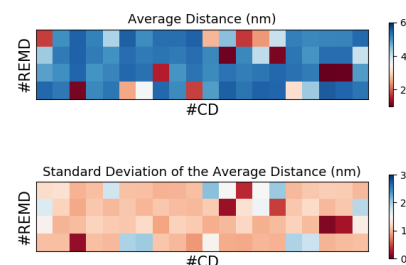

Snapshots taken from the last conformation:

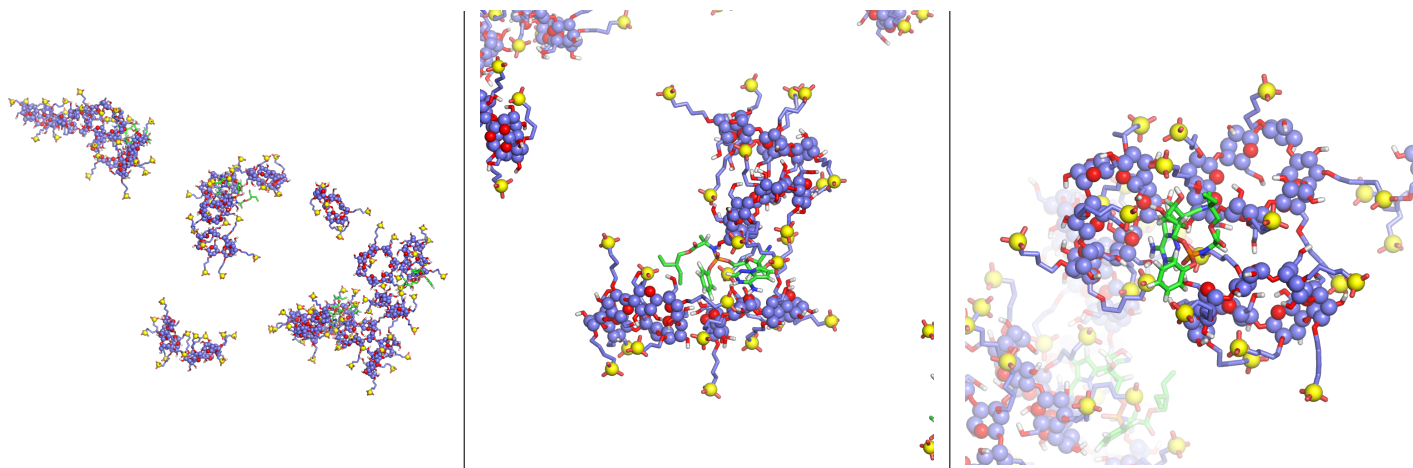

# 20 x 6SBE + 8 x Protonated Remdesivir

Distance between cyclodextrins and remdesivir molecules as a function of time:

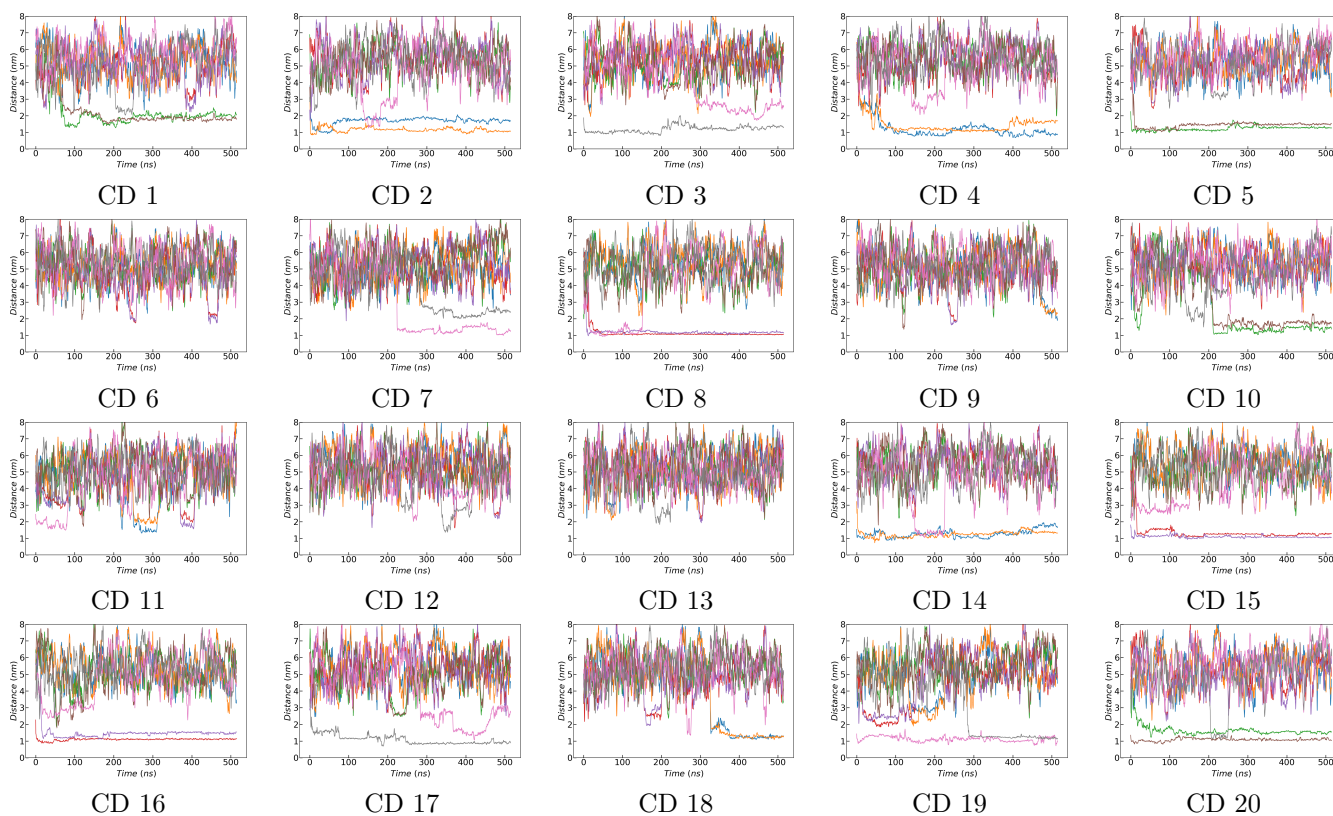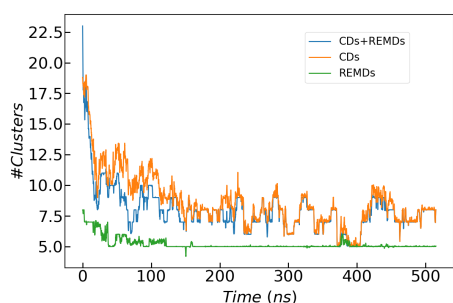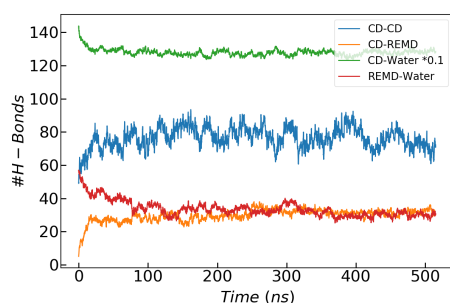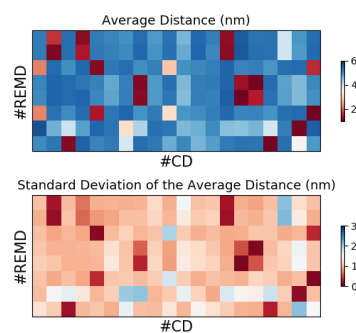

Snapshots taken from the last conformation:

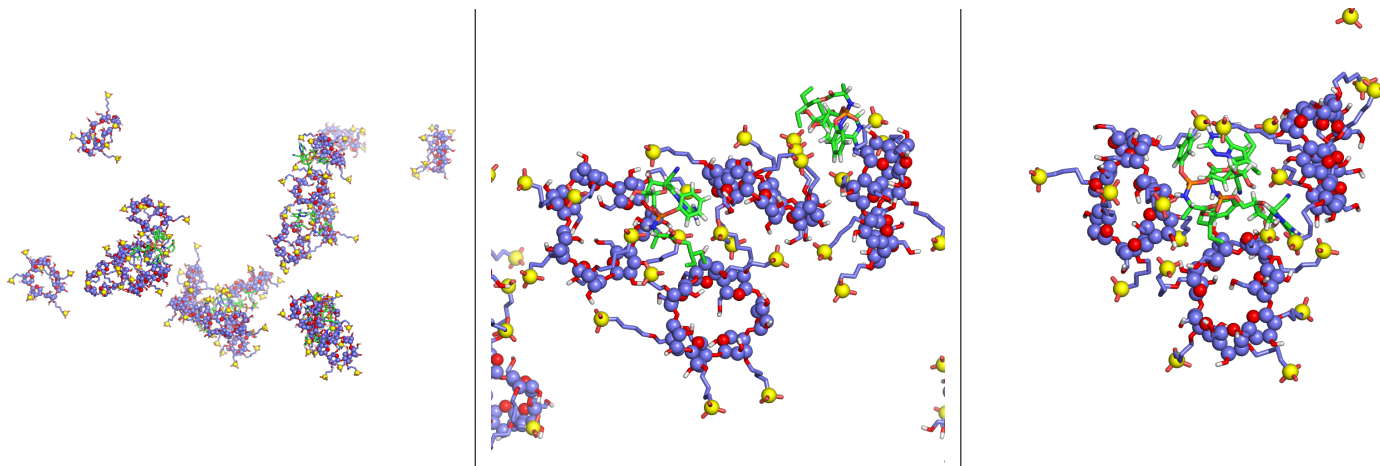



# 20 x 7SBE + 1 x Neutral Remdesivir

Distance between cyclodextrins and remdesivir molecules as a function of time:

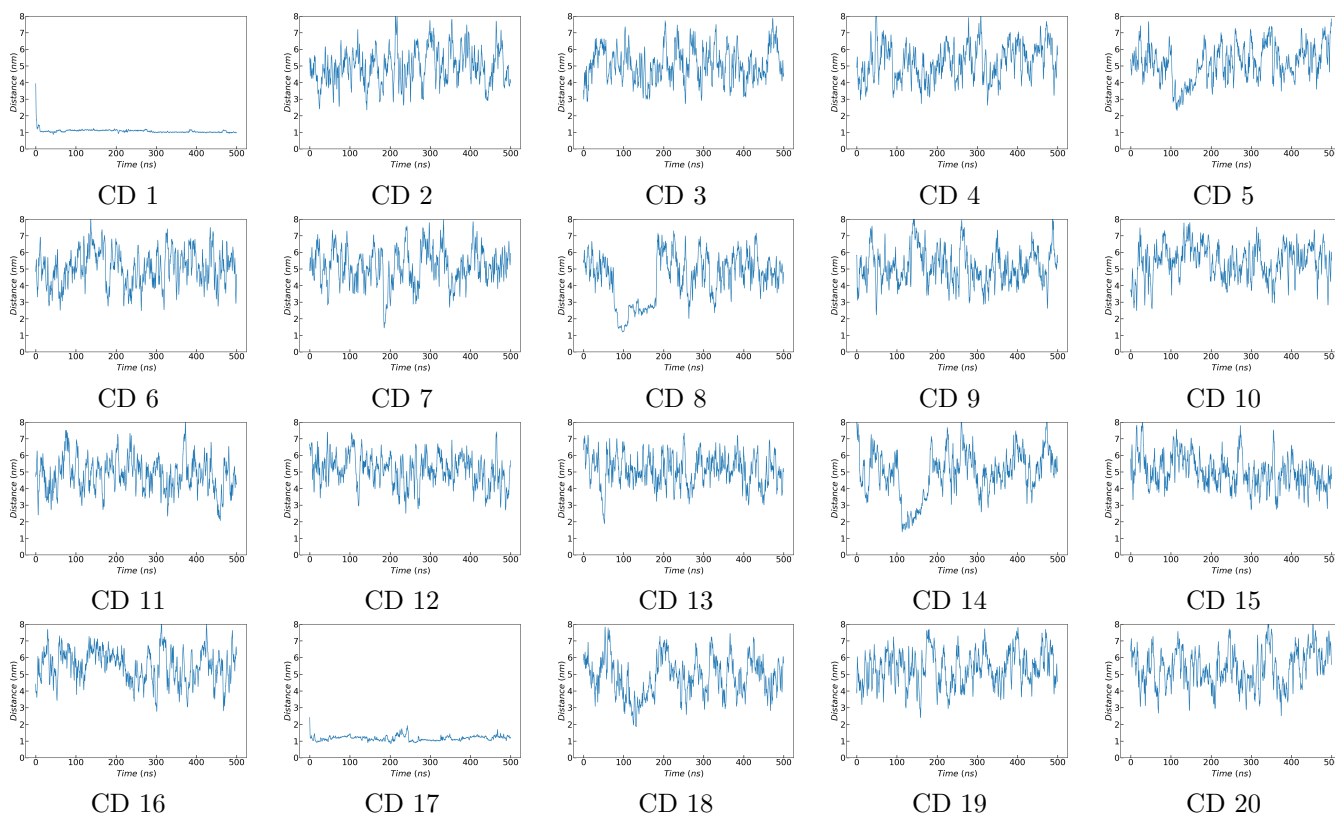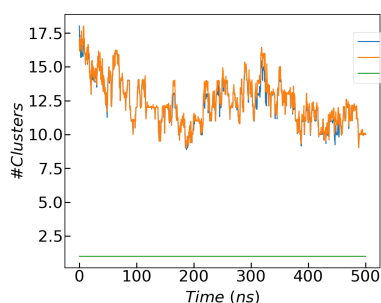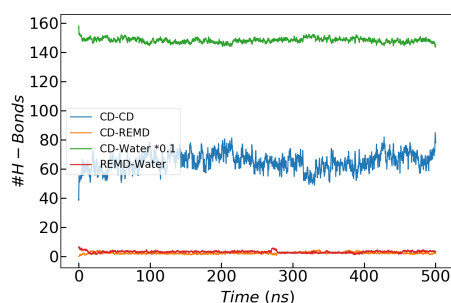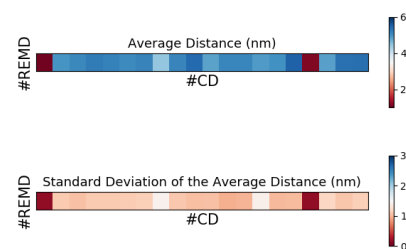

Snapshots taken from the last conformation:

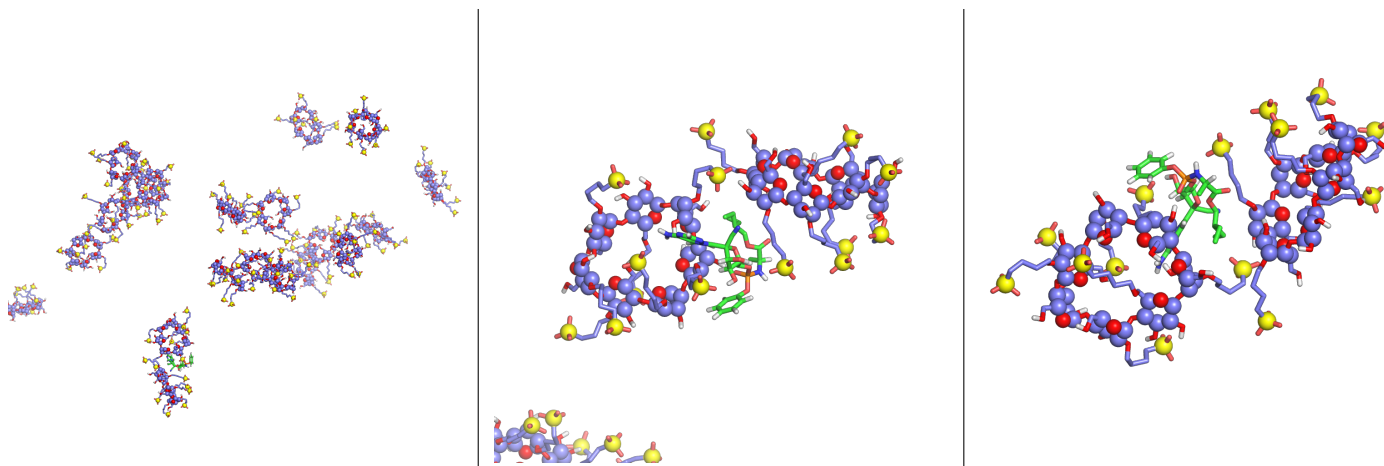

# 20 x 7SBE + 2 x Neutral Remdesivir

Distance between cyclodextrins and remdesivir molecules as a function of time:

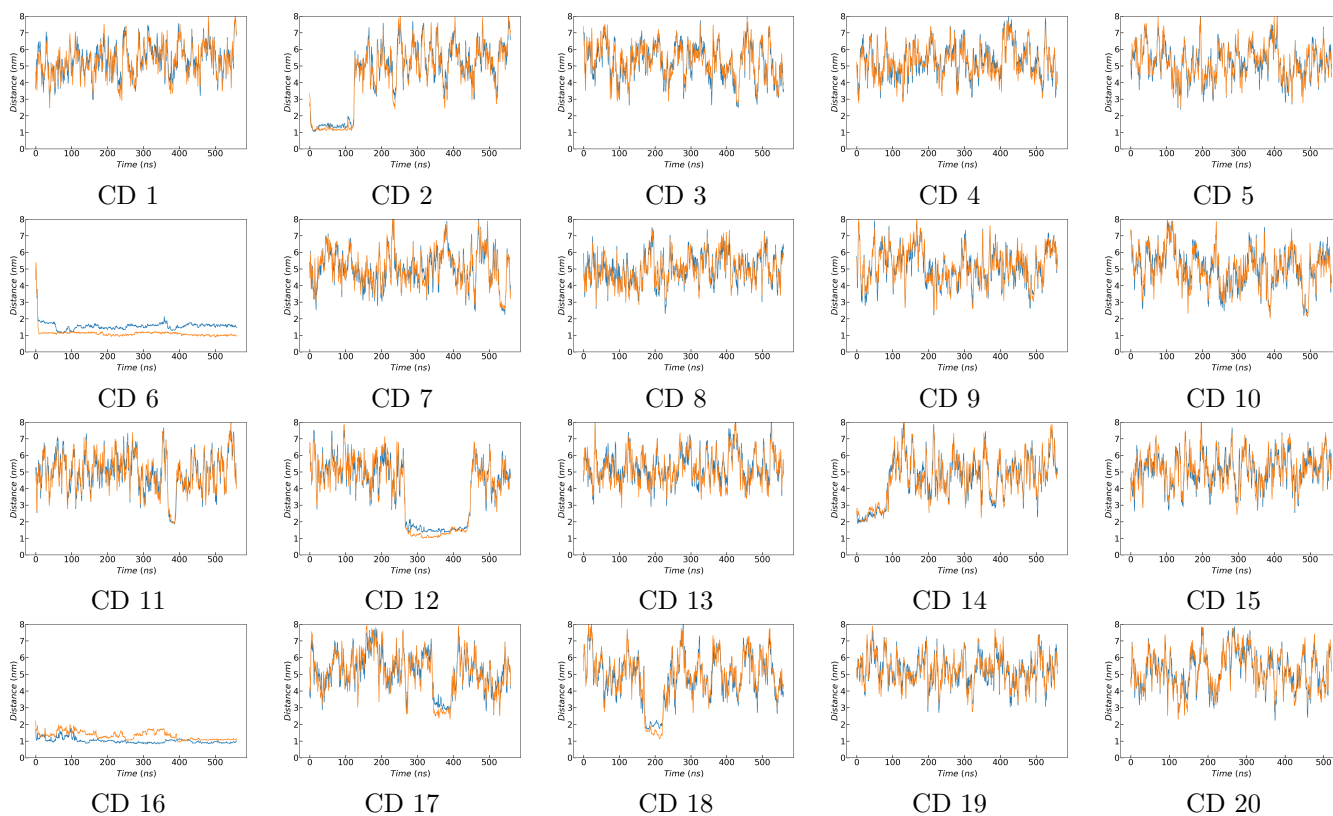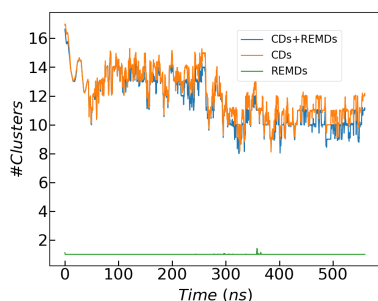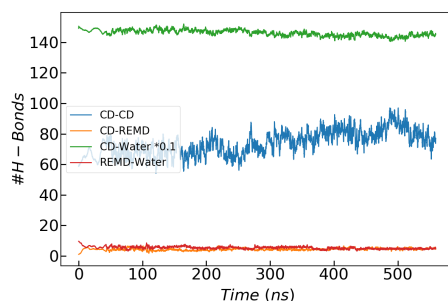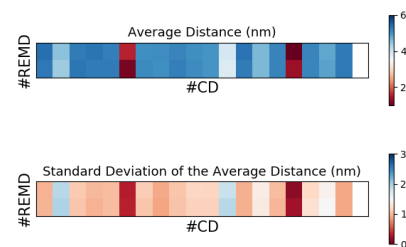

Snapshots taken from the last conformation:

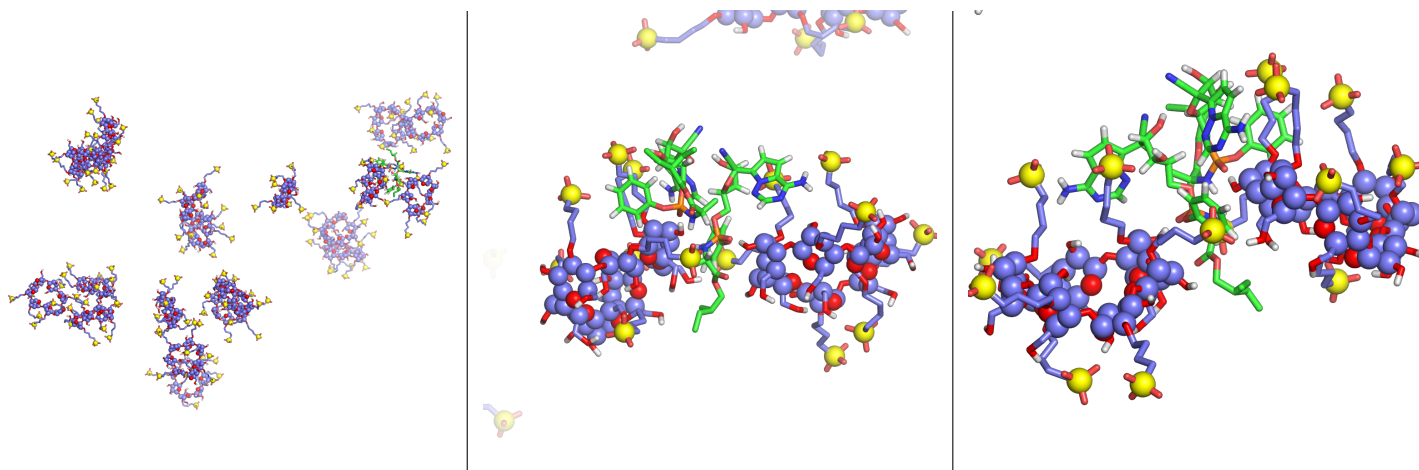

# 20 x 7SBE + 4 x Neutral Remdesivir

Distance between cyclodextrins and remdesivir molecules as a function of time:

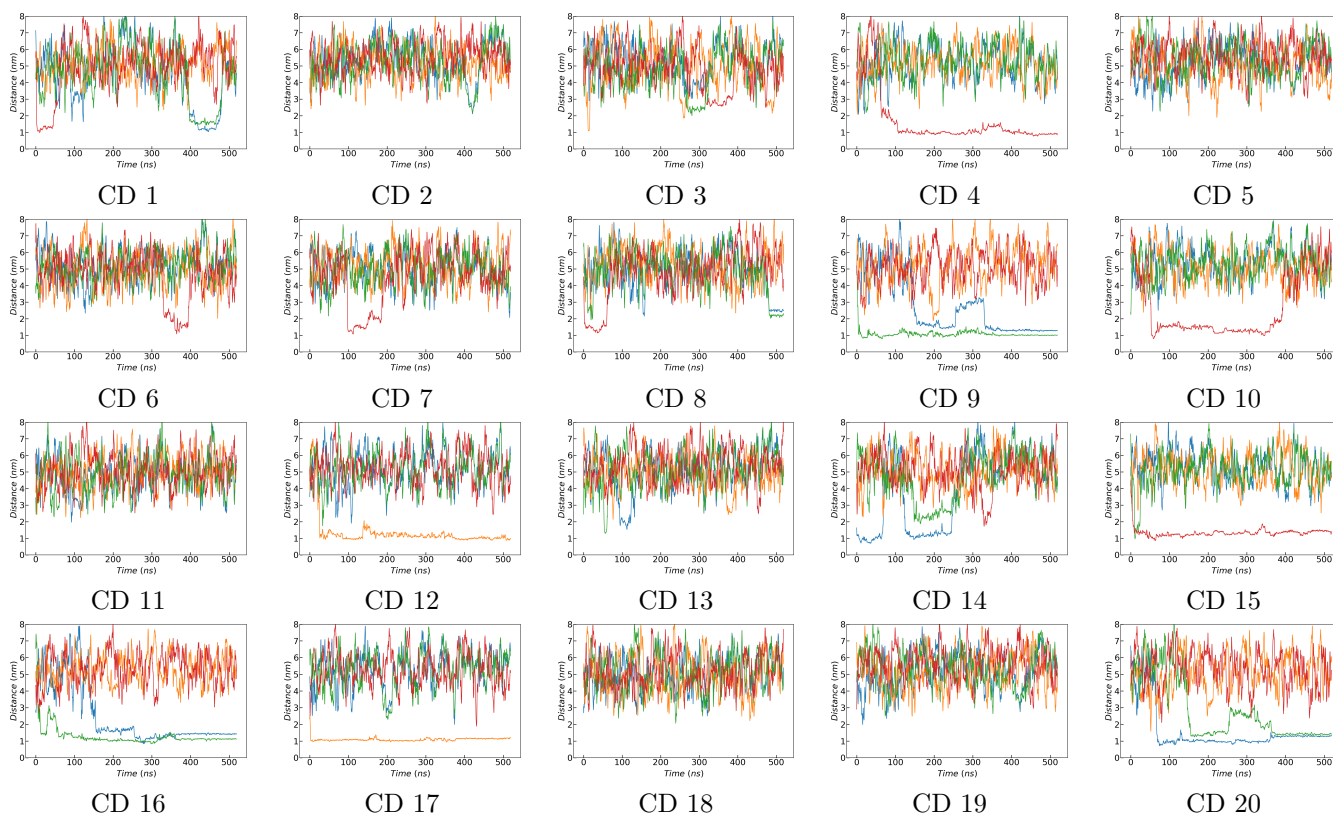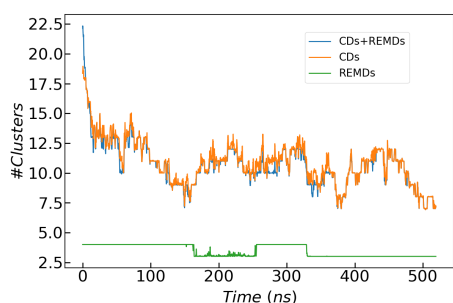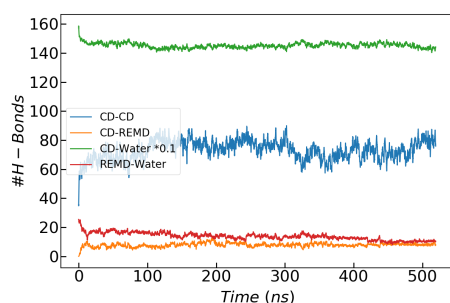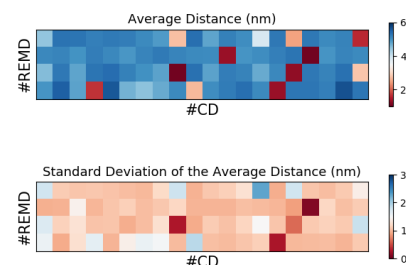

Snapshots taken from the last conformation:

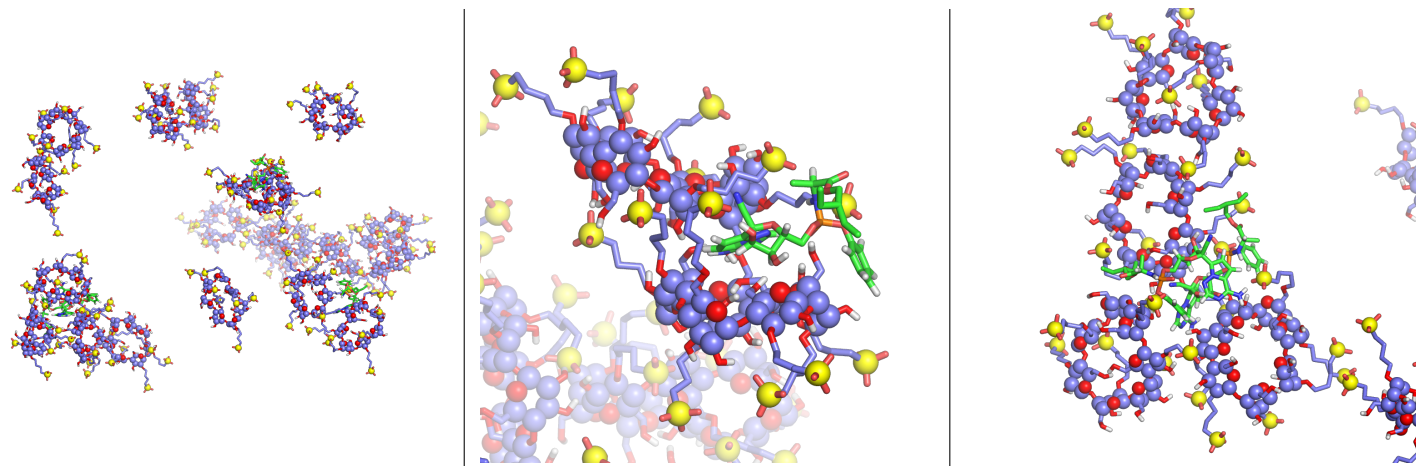

# 20 x 7SBE + 8 x Neutral Remdesivir

Distance between cyclodextrins and remdesivir molecules as a function of time:

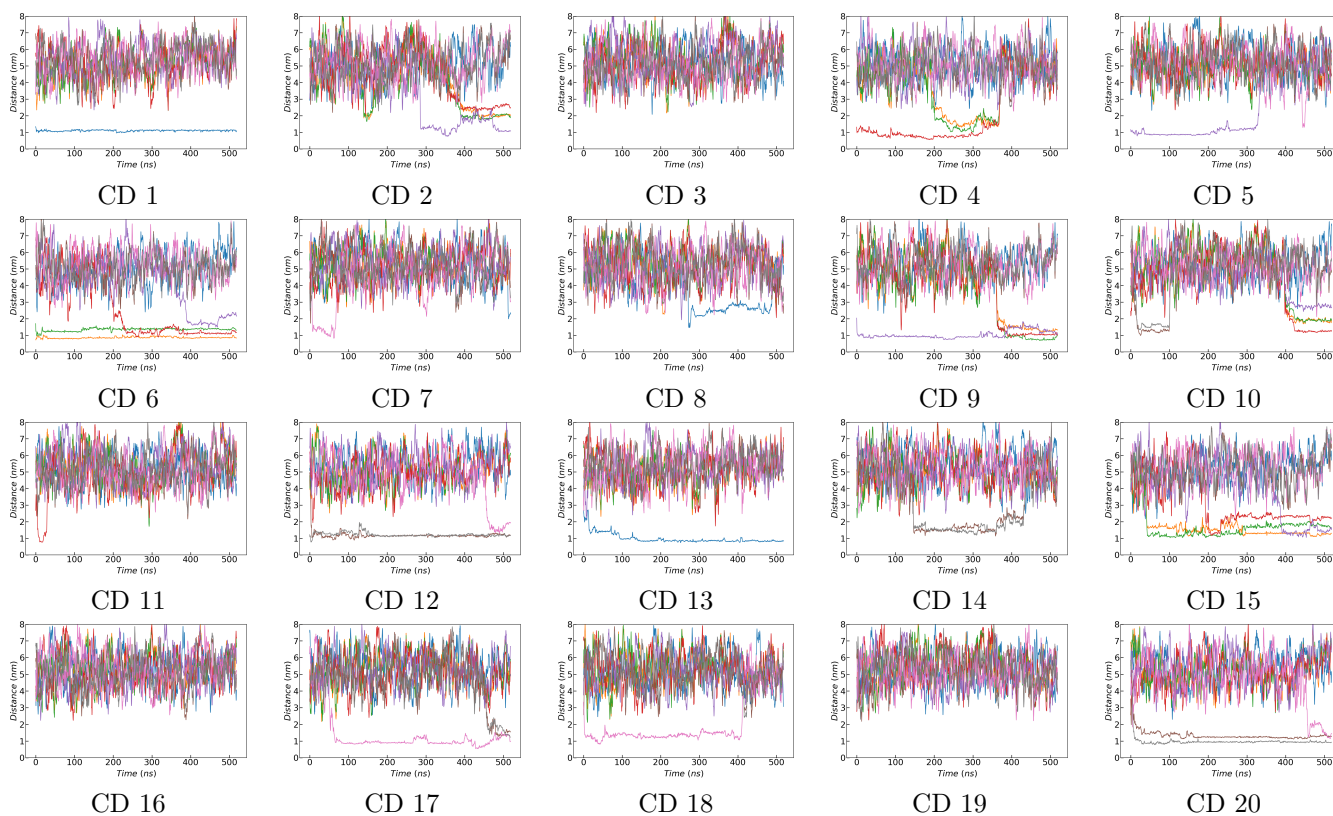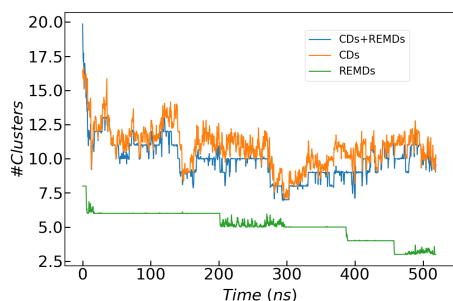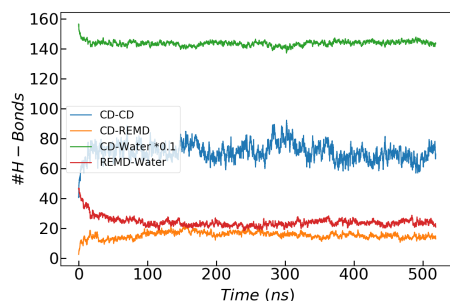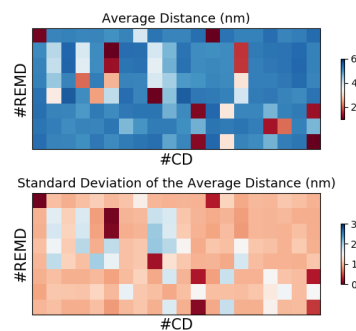

Snapshots taken from the last conformation:

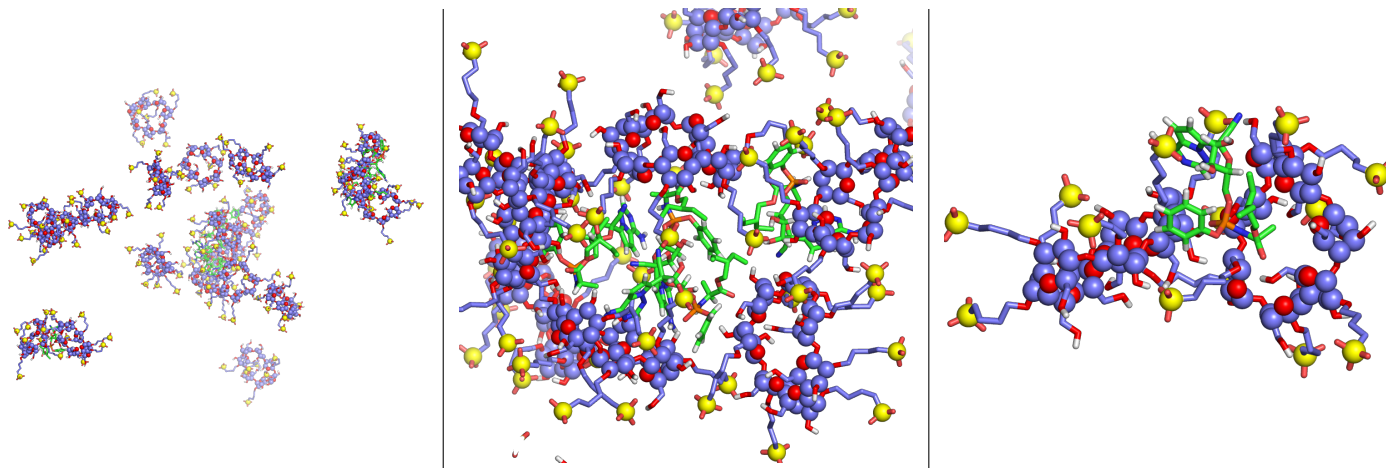



# 20 x 7SBE + 1 x Protonated Remdesivir

Distance between cyclodextrins and remdesivir molecules as a function of time:

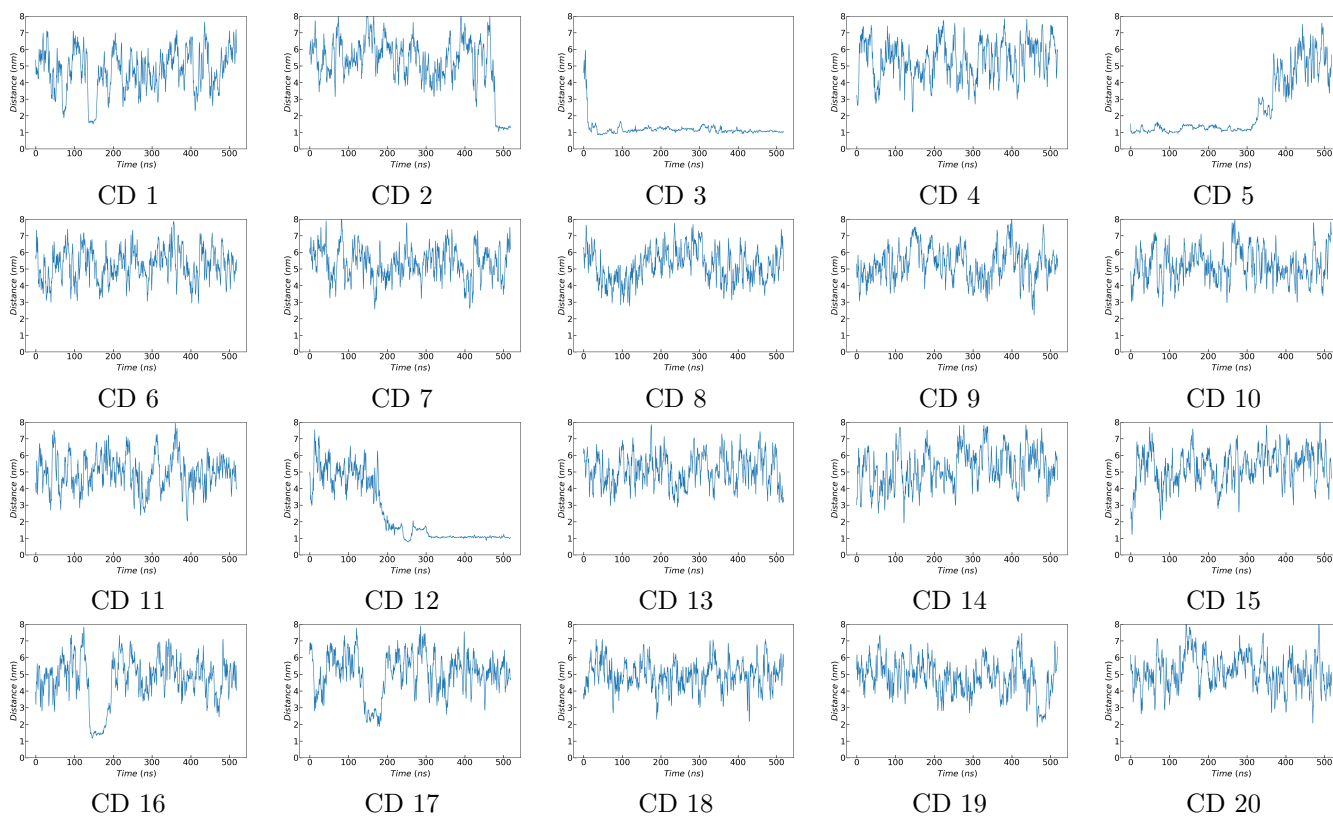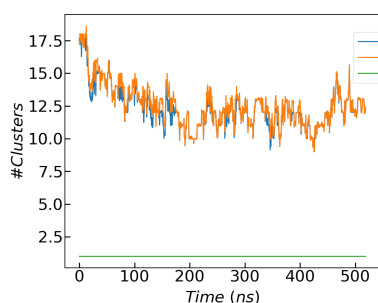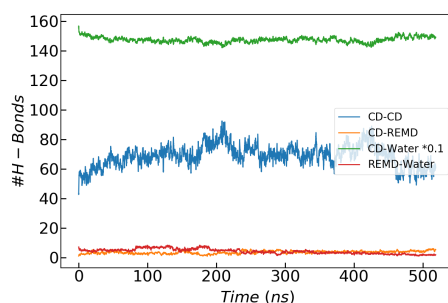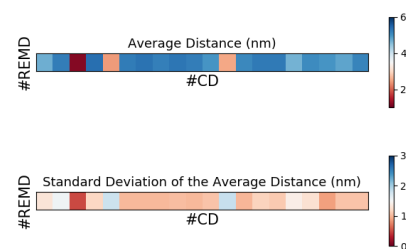

Snapshots taken from the last conformation:

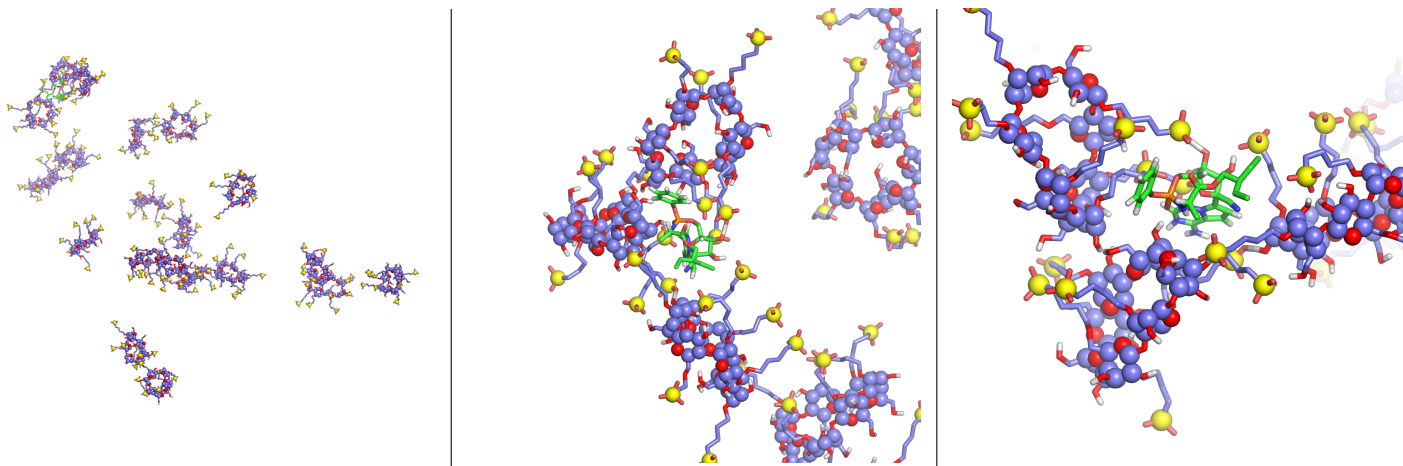

# 20 x 7SBE + 2 x Protonated Remdesivir

Distance between cyclodextrins and remdesivir molecules as a function of time:

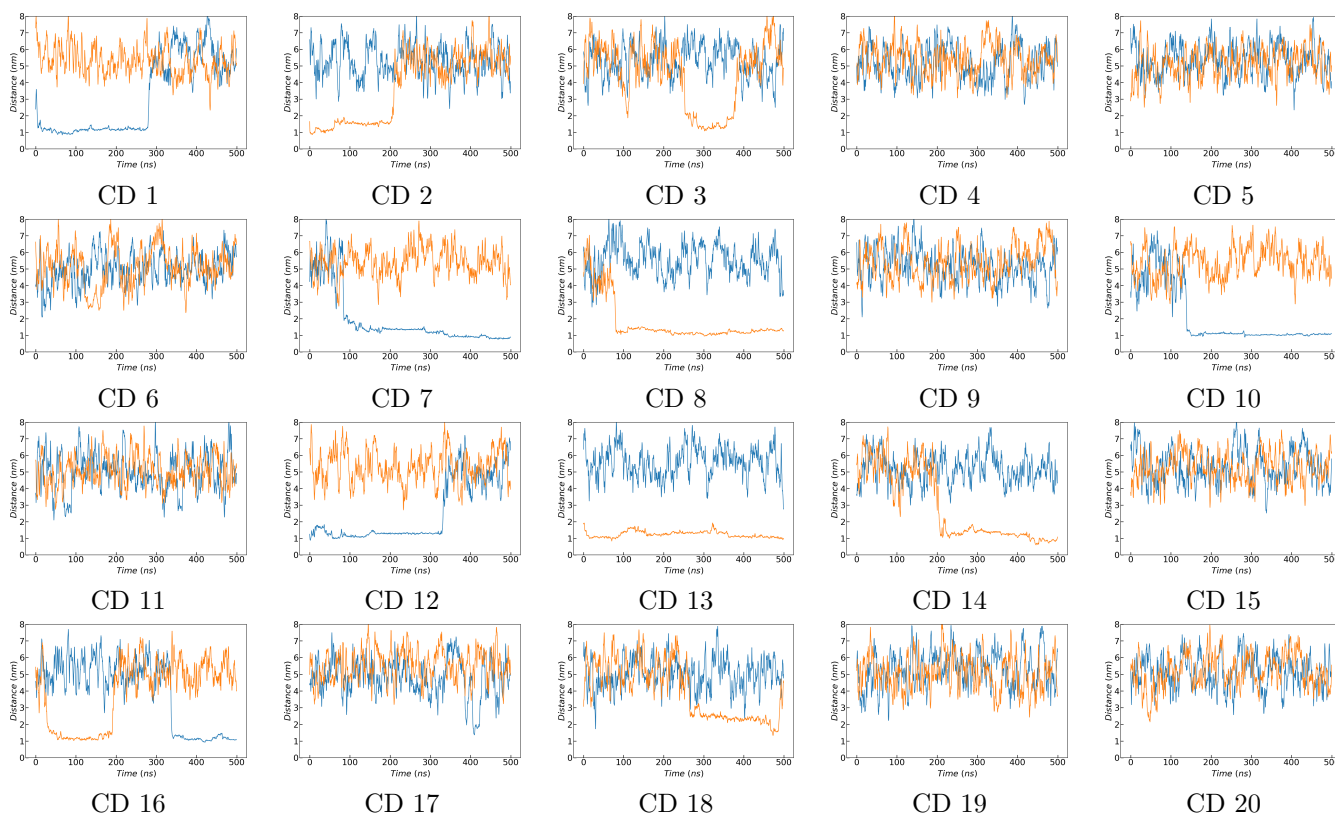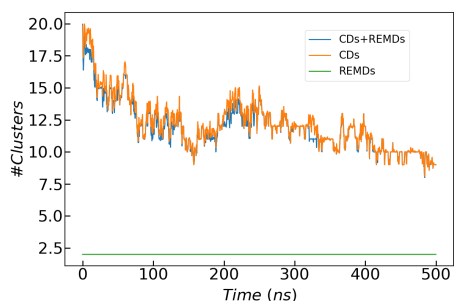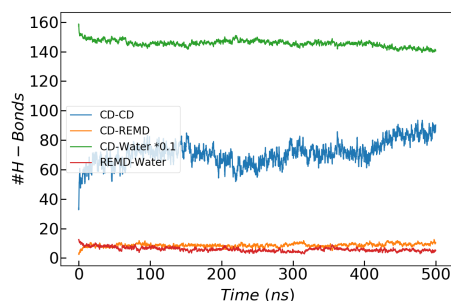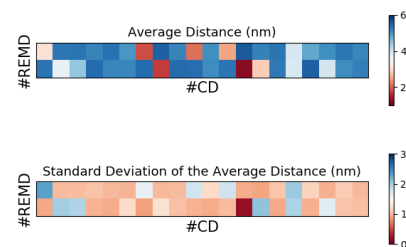

Snapshots taken from the last conformation:

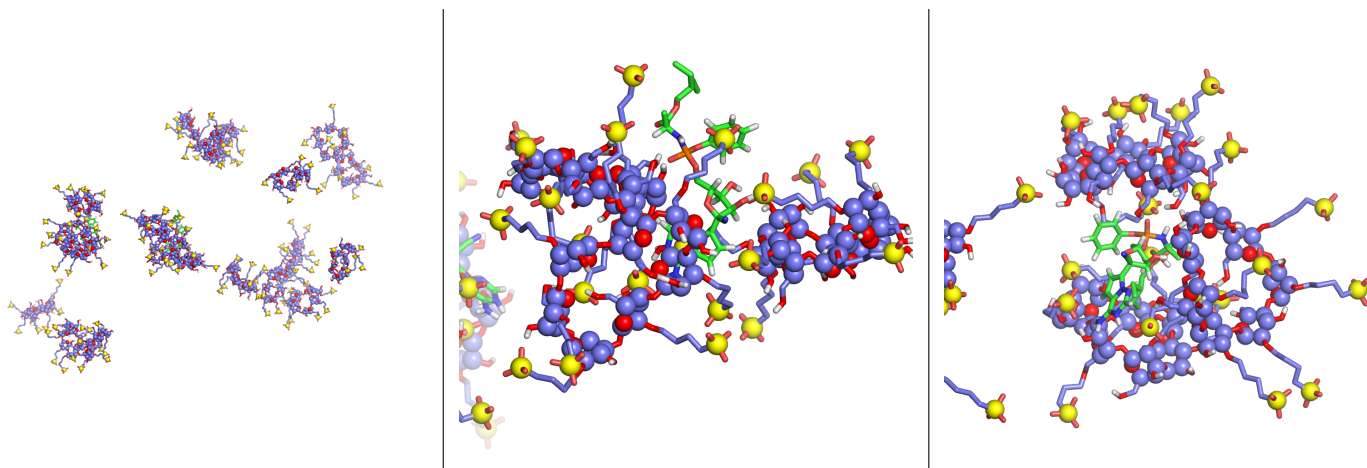

# 20 x 7SBE + 4 x Protonated Remdesivir

Distance between cyclodextrins and remdesivir molecules as a function of time:

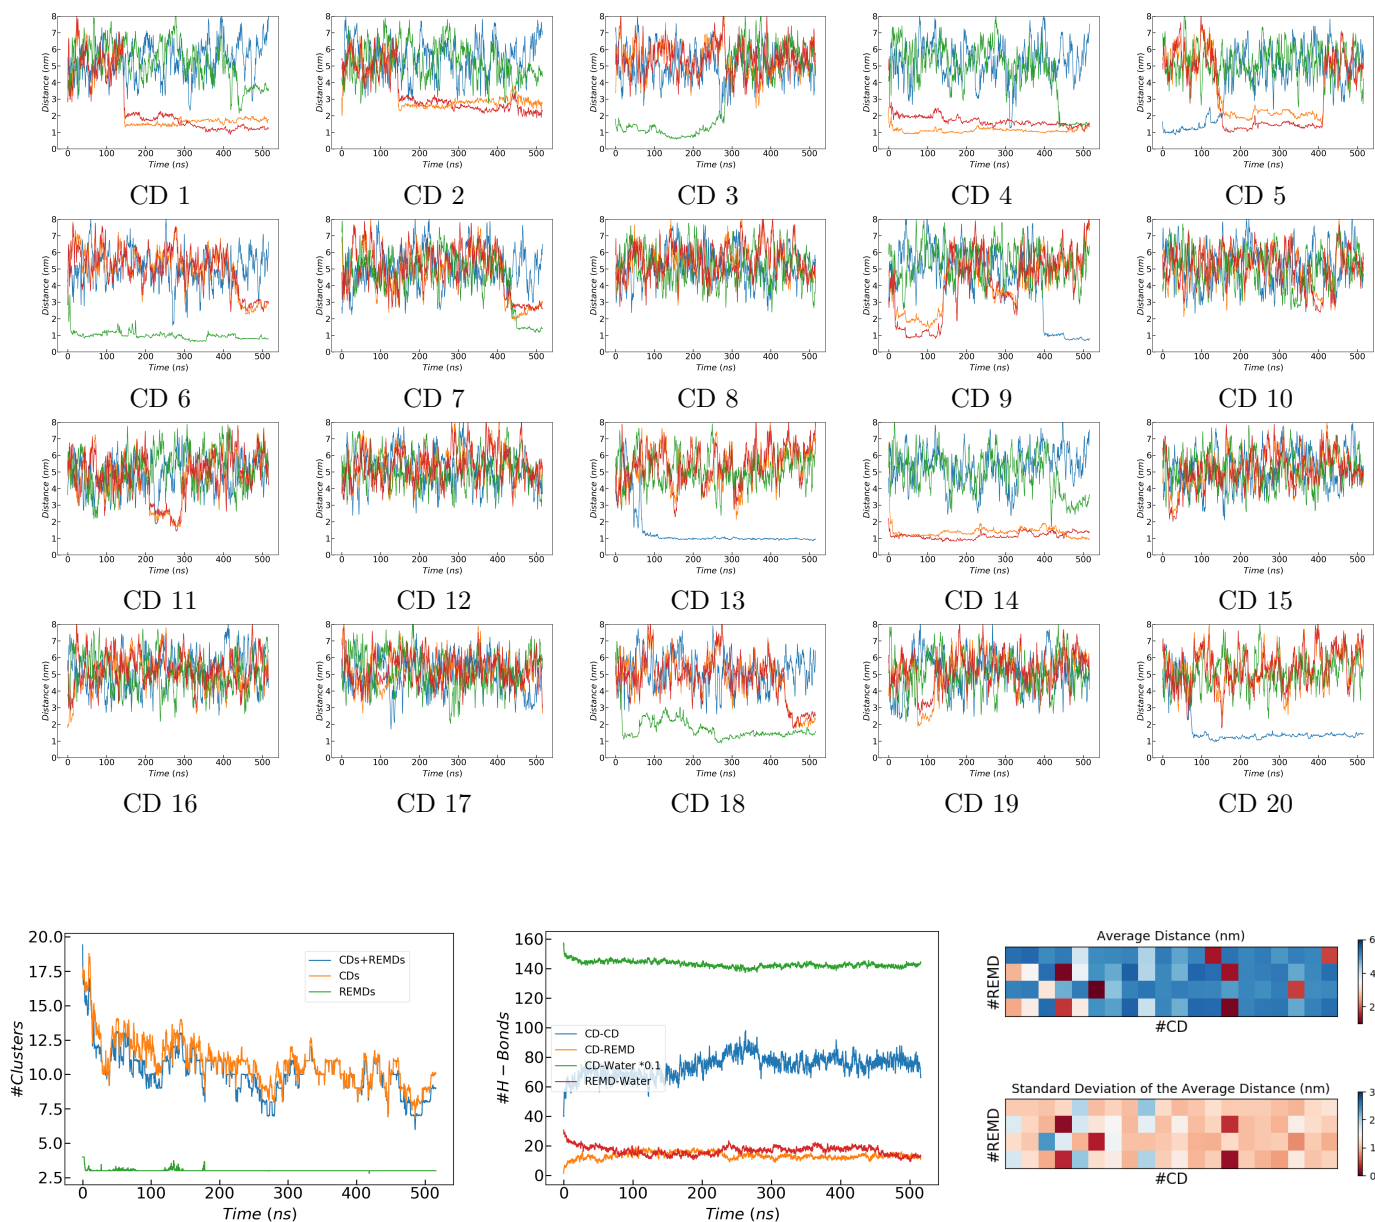

Snapshots taken from the last conformation:

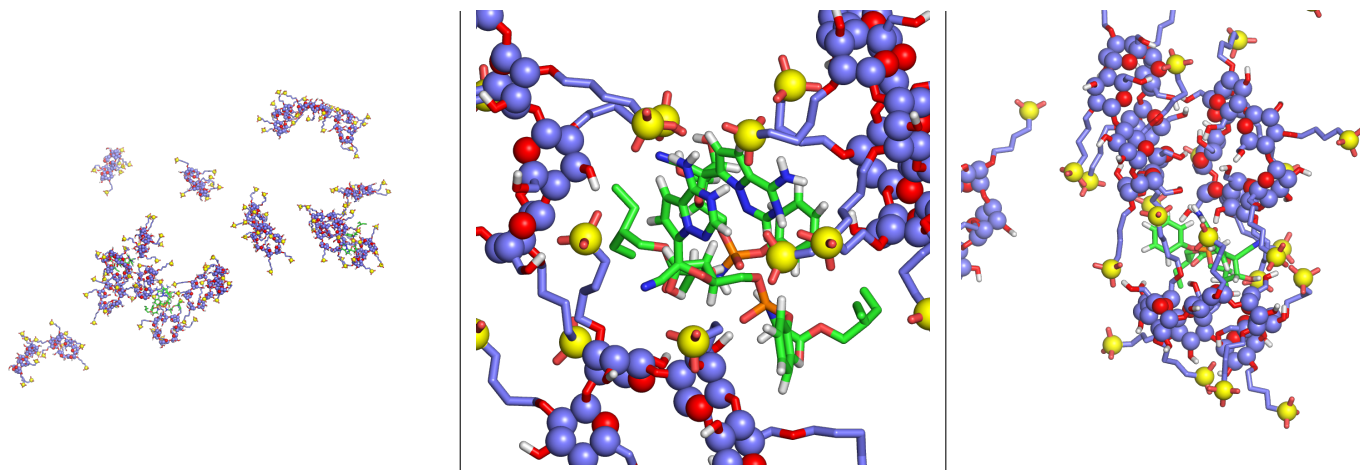

# 20 x 7SBE + 8 x Protonated Remdesivir

Distance between cyclodextrins and remdesivir molecules as a function of time:

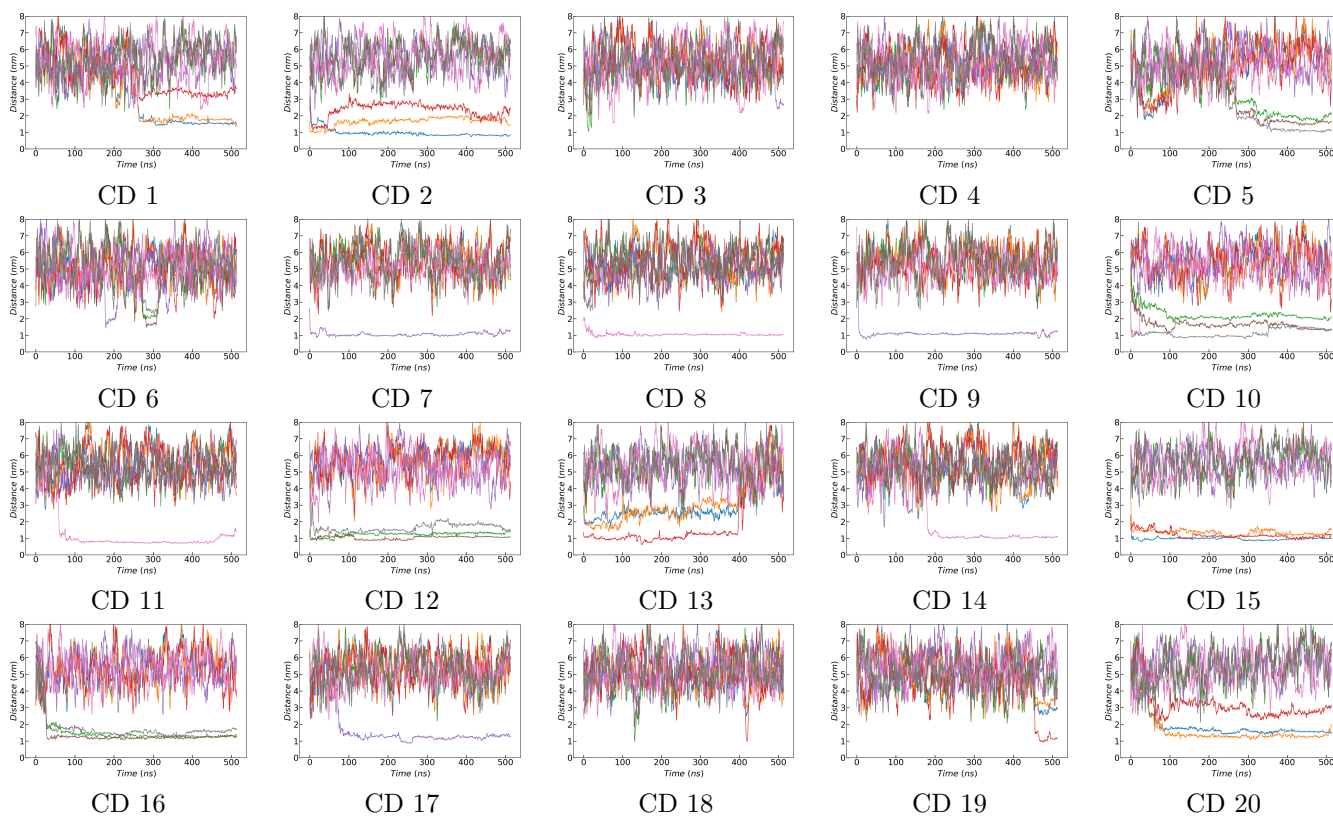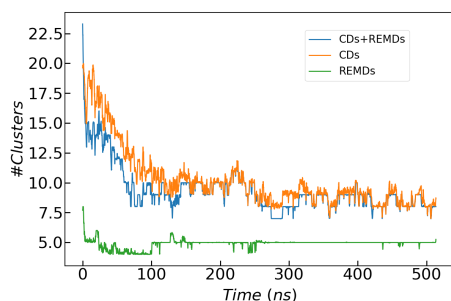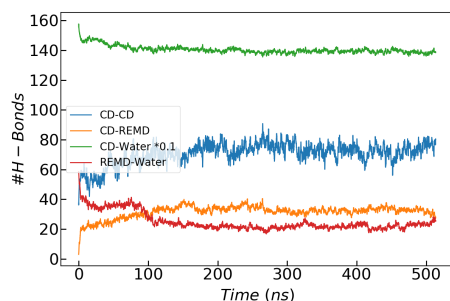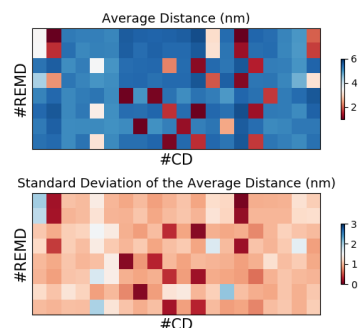

Snapshots taken from the last conformation:

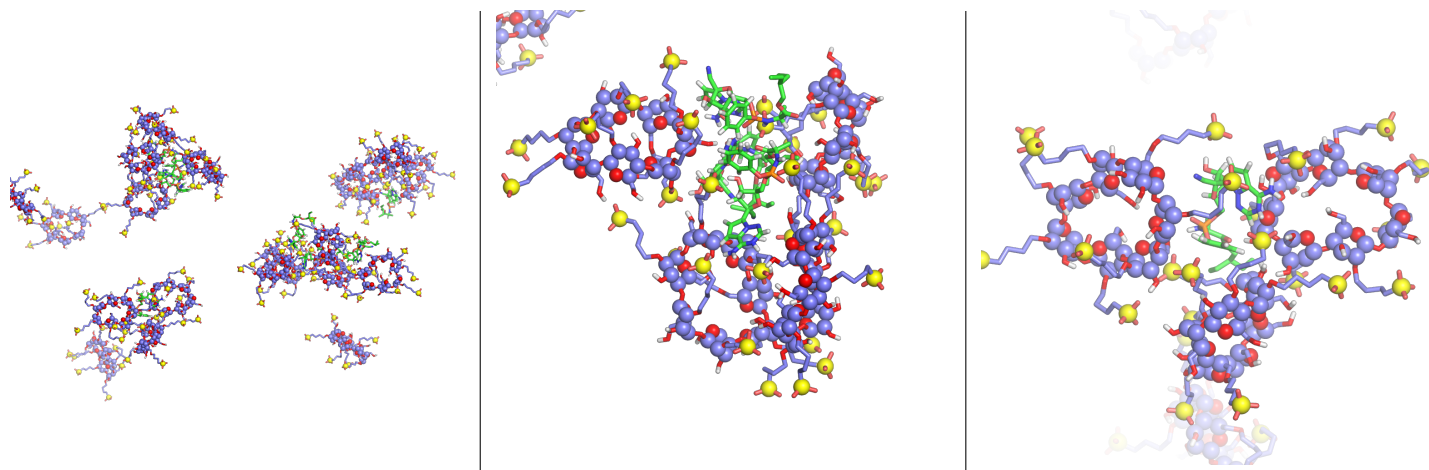

Supplement: mmc1.pdf [file mmc1.pdf]
